# Supplementary material for: Deep Untargeted Metabolomics Analysis to Further Characterize the Adaptation Response of Gliricidia sepium (Jacq.) Walp. to Very High Salinity Stress
Source: Front Plant Sci. 2022 May 19;13:869105. doi: 10.3389/fpls.2022.869105 (PMC9161747; doi:10.3389/fpls.2022.869105)
Supplement: Supplementary Table 1 — Physicochemical properties of the substrate and the mineral composition of canopy and roots of gliricidia plants at the end of the experiment, according to the NaCl level (g of NaCl per 100 g of substrate) applied. The values represent an average of five samples, followed by the standard deviation of the mean. The asterisks indicate a significant difference between the two groups (t-test or Mann-Whitney test).*p ≤ 0.05; **p ≤ 0.01; ***p ≤ 0.001; ****p ≤ 0.0001. pH H2O: pH of the soil in water; P, Phosphorus; Ca2+, Calcium; Mg2+, Magnesium; K+, Potassium; Na+, Sodium; Al3+, Aluminum; CTC, Cation exchange capacity; V, Base saturation; m, Saturation by aluminum; ISNa, Sodium Saturation Index; OM, Organic Matter; B, Boron; Cu, Copper; Fe, Iron; Mn, Manganese; Zn, Zinc; S, Sulfur; N, Nitrogen; and Cl-, Chlorine. ND, Not Determined. [file Data_Sheet_1.xlsx]

## Sheet: Supplementary_Table_1
Substrate (Assorted Complex)	NaCl level (g / 100 g of substrate)	pH H2O*	P	S	Ca2+	Mg2+	K+	Na+	Al3+	H+Al	Sum of bases		CTC	V	m	ISNa	C	OM
			ppm		mE/100mL								cmol/dm3	%			g/kg
	0.0	6.0±0.16 ***	11.68±0.57 ****	29.64±9.26	11.66±0.52	3.76±0.30	0.678±0.18	0.382±0.14	0.00±0.00	2.78±0.22	16.48±0.70		19.26±0.54	85.6±1.52	0.00±0.00	2.4±1.14	62.96±5.52	108.28±9.50
	0.8	5.42±0.18	8.76±0.51	55.54±40.28	12.0±1.08	4.68±0.54 *	1.546±0.22 ***	10.454±0.81 *	0.00±0.00	2.88±0.28	28.68±1.69 **		31.56±1.75 **	91.0±1.00 ***	0.00±0.00	36.4±3.21 **	77.16±8.89 *	132.72±15.30 *
		Micronutrient													Granulometric Composition
		B		Cu		Fe		Mn		Zn		Clay		Sand		Silt
		ppm										g/kg
	0.0	0.116±0.01 **		0.84±0.05		61.34±3.45		35.85±2.63		7.4±0.37 ****		340±22.36 *		515±37.91		145±20.92
	0.8	0.03±0.00		0.88±0.08		67.76±10.85		39.4±6.27		5.5±0.34		305±11.18		565±13.69 *		130±11.18
Canopy		Macronutrient											Micronutrient
		N		P		K+		Ca2+		Mg2+	S	Cl-	B	Cu	Fe	Mn	Zn	Na+
		g/Kg										ppm
	0	39.6±7.30		0.786±0.15		21.782±7.72		12.412±3.02		3.106±0.74	3.908±1.88	2.50±1.77	37.178±10.87	0.794±0.46	164.0±33.08	231.8±76.61	1.272±0.44	0.00±0.00
	0.8	32.2±3.9		1.128±0.22 *		28.984±15.74		11.42±5.79		3.08±0.50	2.572±0.85	18.5±8.94 *	29.684±4.49	2.146±0.62 **	148.7±32.65	367.0±150.84	4.81±2.54 **	10.058±2.11 **
Roots		Macronutrient											Micronutrient
		N		P		K+		Ca2+		Mg2+	S	Cl-	B	Cu	Fe	Mn	Zn	Na+
		g/Kg										ppm
	0	24.6±12.30		0.666±0.15		17.43±10.87		3.052±1.67		2.656±0.63	2.664±1.05	2.0±1.12	10.92±2.36	1.608±0.43	1213.2±662.09	194.0±86.13	1.866±0.52	0.00±0.00
	0.8	24.4±16.06		0.728±0.16		13.632±4.05		4.912±1.98		2.408±0.16	2.56±1.08	11.5±9.62 *	14.964±7.31	2.131±1.26	2666.25±756.86 *	228.0±98.13	2.978±1.18	12.33±2.25 **
Legend: The values represent an average of five samples, followed by the standard deviation of the mean. The asterisks indicate a significant difference between the two groups (t-test).* p ≤ 0.05; ** p ≤ 0.01; *** p ≤ 0.001; **** p ≤ 0.0001. PH H2O: pH of the soil in water; P: Phosphorus; Ca2+: Calcium; Mg2+: Magnesium; K+: Potassium; Na+: Sodium; Al3+: Aluminum; CTC: Cation exchange capacity; V:…

## Sheet: Supplementary_Table_2
Organ	m.z	mode	Matched.Compound	Matched.Form	Mass.Diff	Fold_Change_AE	Log2(FC)_AE	Profile_AE	Fold_Change_STS	Log2(FC)_STS	Profile_STS	Fold_Change_LTS2	Log2(FC)_LTS2	Profile_LTS2	Fold_Change_LTS_Final	Log2(FC)_LTS_Final	Profile_LTS_Final
Leaf	79.0389	positive	C00258	M-CO+H[1+]	1.86532e-05	1	0	Non-DE	2.217	1.14861	Up	1	0	Non-DE	2.217	1.14861	Up
Leaf	80.0348	positive	C01678	M(Cl37)+H[1+]	0.000378194	0.28718	-1.79997	Down	1	0	Non-DE	0.31576	-1.6631	Down	1.09952	0.136873	Up
Leaf	84.0441	positive	C00188	M-H4O2+H[1+]	0.000247476	0.69548	-0.523919	Down	0.455	-1.13606	Down	1	0	Non-DE	0.654224	-0.612142	Down
Leaf	85.028	positive	C00074	M-HCOOK+H[1+]	0.000301521	0.39155	-1.35273	Down	0.581	-0.78339	Down	1	0	Non-DE	1.48385	0.569342	Up
Leaf	85.0294	negative	C06001	M-H2O-H[-]	8.69952e-05	0.32345	-1.62839	Down	0.029	-5.1078	Down	0.52371	-0.93316	Down	0.046955	-4.41258	Down
Leaf	85.521	positive	C00423	M+H+Na[2+]	0.000179603	0.014053	-6.15298	Down	1	0	Non-DE	0.010198	-6.61557	Down	0.725681	-0.462592	Down
Leaf	87.0437	positive	C00118	M-HCOOK+H[1+]	0.000332497	2.2438	1.16594	Up	4.283	2.09862	Up	1	0	Non-DE	1.90882	0.932678	Up
Leaf	88.0394	positive	C00049	M-HCOOH+H[1+]	5.11462e-05	0.49006	-1.02897	Down	0.696	-0.522841	Down	0.61673	-0.697289	Down	0.875901	-0.19116	Down
Leaf	88.0405	negative	C00099	M-H[-]	5.20638e-05	1	0	Non-DE	0.014	-6.15843	Down	1	0	Non-DE	0.014	-6.15843	Down
Leaf	89.0229	positive	C00122	M-CO+H[1+]	0.000334213	1	0	Non-DE	0.198	-2.33643	Down	1	0	Non-DE	0.198	-2.33643	Down
Leaf	89.024	negative	C00084	M+HCOO[-]	0.00010694	0.31194	-1.68066	Down	0.03	-5.05889	Down	1	0	Non-DE	0.0961723	-3.37823	Down
Leaf	90.0546	positive	C00441	M-CO+H[1+]	0.000283322	0.36262	-1.46347	Down	0.337	-1.56918	Down	1	0	Non-DE	0.929348	-0.10571	Down
Leaf	95.0519	positive	C00116	M(Cl37)+H[1+]	7.05712e-05	0.084699	-3.56151	Down	1	0	Non-DE	0.10854	-3.2037	Down	1.28148	0.35781	Up
Leaf	96.0332	positive	C01762	M(C13)+3H[3+]	0.000377439	1	0	Non-DE	2.361	1.2394	Up	1	0	Non-DE	2.361	1.2394	Up
Leaf	96.0454	negative	C00148	M-H2O-H[-]	2.84802e-05	0.27501	-1.86244	Down	0.015	-6.05889	Down	1	0	Non-DE	0.0545435	-4.19645	Down
Leaf	96.9601	negative	C00059	M-H[-]	4.48248e-05	0.063483	-3.97749	Down	0.013	-6.26534	Down	0.20051	-2.31825	Down	0.0410603	-4.60611	Down
Leaf	98.0488	positive	C03406	M(C13)+3H[3+]	0.000418753	0.2234	-2.1623	Down	1	0	Non-DE	0.2659	-1.91104	Down	1.19024	0.251255	Up
Leaf	98.984	positive	C00033	M+K[1+]	0.000129721	0.34859	-1.5204	Down	1	0	Non-DE	0.32116	-1.63864	Down	0.921312	-0.118239	Down
Leaf	100.076	positive	C00450	M-CO+H[1+]	5.68038e-05	0.33021	-1.59854	Down	1	0	Non-DE	1	0	Non-DE	3.02838	1.59854	Up
Leaf	102.019	negative	C01417	M+CH3COO[-]	0.000147559	1	0	Non-DE	1	0	Non-DE	0.065958	-3.92231	Down	0.065958	-3.92231	Down
Leaf	102.055	positive	C04281	M-CO+H[1+]	4.68618e-05	0.66677	-0.584739	Down	0.478	-1.06492	Down	1	0	Non-DE	0.716889	-0.480179	Down
Leaf	103.003	negative	C00011	M+CH3COO[-]	0.000104556	1	0	Non-DE	0.013	-6.26534	Down	1	0	Non-DE	0.013	-6.26534	Down
Leaf	103.054	positive	C00601	M-H2O+H[1+]	0.000225445	0.48988	-1.0295	Down	0.37	-1.4344	Down	1	0	Non-DE	0.755287	-0.404903	Down
Leaf	104.107	positive	C00407	M-CO+H[1+]	0.000150968	0.41451	-1.27052	Down	0.341	-1.55216	Down	1	0	Non-DE	0.822658	-0.281635	Down
Leaf	105.054	positive	C06010	M-CO+H[1+]	0.000114011	6.1836	2.62845	Up	8.576	3.1003	Up	1	0	Non-DE	1.38689	0.471858	Up
Leaf	105.07	positive	C00903	M-CO+H[1+]	0.000133545	0.017108	-5.86919	Down	0.025	-5.32193	Down	1	0	Non-DE	1.4613	0.547257	Up
Leaf	106.038	positive	C00680	M+H+Na[2+]	0.000319767	0.26077	-1.93915	Down	1	0	Non-DE	0.42575	-1.23192	Down	1.63266	0.707229	Up
Leaf	106.05	positive	C00065	M+H[1+]	1.49618e-05	0.45143	-1.14743	Down	1	0	Non-DE	0.58342	-0.777393	Down	1.29238	0.370033	Up
Leaf	106.065	positive	C00561	M-CO+H[1+]	0.000285818	0.92037	-0.119714	Down	1	0	Non-DE	1	0	Non-DE	1.08652	0.119714	Up
Leaf	107.049	positive	C02666	M-C3H4O2+H[1+]	0.000324653	0.22498	-2.15213	Down	1	0	Non-DE	4.6	2.20163	Up	20.4463	4.35377	Up
Leaf	108.039	positive	C02947	M(C13)+3H[3+]	0.0005136	0.30502	-1.71302	Down	2.2	1.1375	Up	0.30746	-1.70153	Down	2.2176	1.149	Up
Leaf	109.028	positive	C01179	M-C3H4O2+H[1+]	0.000209411	0.51317	-0.962491	Down	1	0	Non-DE	0.41317	-1.27519	Down	0.805133	-0.312701	Down
Leaf	110.985	negative	C03547	M+Cl[-]	0.000162394	0.17086	-2.54911	Down	0.017	-5.87832	Down	0.054192	-4.20578	Down	0.00539192	-7.53498	Down
Leaf	113	positive	C00227	M-CO+H[1+]	8.94877e-06	1	0	Non-DE	1	0	Non-DE	0.10553	-3.24427	Down	0.10553	-3.24427	Down
Leaf	113.034	positive	C00106	M+H[1+]	0.000421049	0.28274	-1.82245	Down	0.268	-1.8997	Down	0.65472	-0.61105	Down	0.620588	-0.688293	Down
Leaf	114.043	positive	C00078	M+H+Na[2+]	5.31142e-05	0.028324	-5.14183	Down	1.976	0.982583	Up	0.081144	-3.62337	Down	5.66094	2.50104	Up
Leaf	114.055	positive	C03741	M-H2O+H[1+]	0.000349267	0.3402	-1.55554	Down	1	0	Non-DE	1	0	Non-DE	2.93945	1.55554	Up
Leaf	114.102	positive	C00860	M-CO+H[1+]	8.99558e-05	0.025464	-5.2954	Down	1	0	Non-DE	1	0	Non-DE	39.2711	5.2954	Up
Leaf	115.086	positive	C00077	M-H2O+H[1+]	8.01048e-05	0.15386	-2.70031	Down	0.034	-4.87832	Down	1	0	Non-DE	0.22098	-2.17801	Down
Leaf	116.071	positive	C01102	M-HCOOK+H[1+]	1.18358e-05	0.37433	-1.41762	Down	1	0	Non-DE	2.7096	1.43808	Up	7.23853	2.8557	Up
Leaf	117.019	negative	C00546	M+HCOO[-]	6.3028e-05	0.11688	-3.0969	Down	0.004	-7.96578	Down	1	0	Non-DE	0.0342231	-4.86888	Down
Leaf	117.029	positive	C00020	M(C13)+3H[3+]	0.000105146	0.046315	-4.43238	Down	0.016	-5.96578	Down	1	0	Non-DE	0.34546	-1.53341	Down
Leaf	118.05	positive	C00940	M-CO+H[1+]	9.32838e-05	0.647	-0.628162	Down	1	0	Non-DE	0.75359	-0.408148	Down	1.16474	0.220014	Up
Leaf	118.051	negative	C01888	M+HCOO[-]	0.000156649	1	0	Non-DE	1	0	Non-DE	0.016678	-5.90591	Down	0.016678	-5.90591	Down
Leaf	118.086	positive	C04076	M-CO+H[1+]	0.00018199	1	0	Non-DE	1	0	Non-DE	2.216	1.14796	Up	2.216	1.14796	Up
Leaf	119.034	negative	C00163	M+HCOO[-]	2.8364e-05	0.062239	-4.00604	Down	0.02	-5.64386	Down	0.23819	-2.06982	Down	0.0765404	-3.70763	Down
Leaf	119.05	negative	C06178	M+Cl[-]	0.000311725	0.24125	-2.0514	Down	0.022	-5.50635	Down	1	0	Non-DE	0.0911917	-3.45495	Down
Leaf	119.089	positive	C00719	M(C13)+H[1+]	0.000426068	0.14974	-2.73947	Down	1	0	Non-DE	5.7192	2.51581	Up	38.1942	5.25528	Up
Leaf	120.08	positive	C00483	M-H2O+H[1+]	0.000260746	1	0	Non-DE	1	0	Non-DE	17.981	4.1684	Up	17.981	4.1684	Up
Leaf	124.015	positive	C05823	M(C13)+H[1+]	0.000150385	0.082513	-3.59923	Down	1	0	Non-DE	0.077195	-3.69535	Down	0.93555	-0.096114	Down
Leaf	124.039	positive	C00253	M+H[1+]	0.000355076	0.21993	-2.18488	Down	0.099	-3.33643	Down	1	0	Non-DE	0.450143	-1.15154	Down
Leaf	130.05	positive	C03082	M-HCOOK+H[1+]	8.96938e-05	0.47022	-1.08859	Down	1	0	Non-DE	1	0	Non-DE	2.12666	1.08859	Up
Leaf	130.051	negative	C02659	M+HCOO[-]	0.000164949	0.11559	-3.11291	Down	0.036	-4.79586	Down	0.16906	-2.56439	Down	0.052653	-4.24734	Down
Leaf	130.086	positive	C00408	M+H[1+]	7.31678e-05	0.00019426	-12.3297	Down	1	0	Non-DE	1	0	Non-DE	5147.74	12.3297	Up
Leaf	131.037	positive	C01061	M-HCOONa+H[1+]	0.000262567	2.1098	1.07711	Up	1	0	Non-DE	2.6868	1.42589	Up	1.27349	0.348783	Up
Leaf	131.053	positive	C17216	M-HCOOH+H[1+]	4.11332e-05	0.47064	-1.0873	Down	0.622	-0.685014	Down	1	0	Non-DE	1.3216	0.402291	Up
Leaf	131.129	positive	C00179	M+H[1+]	0.000236535	0.033517	-4.89896	Down	1	0	Non-DE	1	0	Non-DE	29.8356	4.89896	Up
Leaf	132.041	negative	C02091	M-H[-]	0.000262133	0.042342	-4.56177	Down	0.001	-9.96578	Down	1	0	Non-DE	0.0236172	-5.40402	Down
Leaf	132.065	positive	C06055	M-HCOOK+H[1+]	0.000419858	0.40193	-1.31498	Down	1	0	Non-DE	1	0	Non-DE	2.488	1.31498	Up
Leaf	132.102	positive	C01233	M-HCOOK+H[1+]	0.000142664	0.13878	-2.84913	Down	1	0	Non-DE	24.103	4.59114	Up	173.678	7.44027	Up
Leaf	133.031	positive	C02226	M(Cl37)+H[1+]	0.000313753	0.15483	-2.69124	Down	1	0	Non-DE	17.823	4.15567	Up	115.113	6.84691	Up
Leaf	133.061	positive	C02642	M+H[1+]	0.000218699	1	0	Non-DE	1	0	Non-DE	2.4493	1.29237	Up	2.4493	1.29237	Up
Leaf	134.017	negative	C00149	M(C13)-H[-]	0.000418635	1	0	Non-DE	0.011	-6.50635	Down	0.64611	-0.630148	Down	0.00710721	-7.1365	Down
Leaf	134.081	positive	C00956	M-CO+H[1+]	0.000168112	0.18545	-2.4309	Down	0.167	-2.58208	Down	1	0	Non-DE	0.900512	-0.151182	Down
Leaf	135.029	negative	C01013	M+HCOO[-]	7.3842e-05	0.27674	-1.8534	Down	0.043	-4.53952	Down	0.47837	-1.0638	Down	0.0743294	-3.74992	Down
Leaf	136.062	positive	C00147	M+H[1+]	0.000204952	0.22655	-2.1421	Down	1	0	Non-DE	0.36576	-1.45103	Down	1.61448	0.691068	Up
Leaf	136.075	positive	C03758	M-H2O+H[1+]	0.000359568	0.14903	-2.74633	Down	1	0	Non-DE	3.63	1.85997	Up	24.3575	4.60629	Up
Leaf	137.063	positive	C03089	M-CO2+H[1+]	0.000312171	0.22811	-2.1322	Down	1	0	Non-DE	0.3604	-1.47233	Down	1.57994	0.659869	Up
Leaf	137.081	positive	C01019	M-CO+H[1+]	0.000206067	0.3345	-1.57992	Down	1	0	Non-DE	0.34663	-1.52853	Down	1.03626	0.0513903	Up
Leaf	138.055	positive	C00108	M+H[1+]	2.17398e-05	0.29504	-1.76102	Down	1	0	Non-DE	0.40917	-1.28923	Down	1.38683	0.47179	Up
Leaf	141.054	positive	C00544	M-CO+H[1+]	0.000239111	0.44356	-1.1728	Down	1	0	Non-DE	0.55407	-0.85186	Down	1.24914	0.320939	Up
Leaf	143.001	positive	C11537	M-CO+H[1+]	0.000652033	1	0	Non-DE	2.529	1.33857	Up	1	0	Non-DE	2.529	1.33857	Up
Leaf	144.065	positive	C03972	M-CO+H[1+]	0.000185148	0.012568	-6.3141	Down	1	0	Non-DE	0.0081305	-6.94244	Down	0.646921	-0.628339	Down
Leaf	145.061	negative	C21029	M-H[-]	0.000379233	1	0	Non-DE	0.031	-5.01159	Down	1	0	Non-DE	0.031	-5.01159	Down
Leaf	146.035	positive	C00555	M+NaCl[1+]	0.000339333	0.39372	-1.34476	Down	1	0	Non-DE	0.46796	-1.09554	Down	1.18856	0.249215	Up
Leaf	146.046	negative	C01234	M+HCOO[-]	0.000231927	0.42267	-1.2424	Down	0.032	-4.96578	Down	1	0	Non-DE	0.0757092	-3.72339	Down
Leaf	146.046	negative	C00025	M-H[-]	0.000126686	0.15038	-2.73332	Down	0.026	-5.26534	Down	0.30891	-1.69474	Down	0.0534091	-4.22677	Down
Leaf	147.03	negative	C00164	M+HCOO[-]	0.000233842	1	0	Non-DE	0.031	-5.01159	Down	1	0	Non-DE	0.031	-5.01159	Down
Leaf	147.033	positive	C17238	M+H+Na[2+]	0.000648833	0.42996	-1.21773	Down	1	0	Non-DE	0.512	-0.965784	Down	1.19081	0.251941	Up
Leaf	147.065	positive	C04236	M-CO+H[1+]	0.000477597	0.37665	-1.4087	Down	0.546	-0.873027	Down	1	0	Non-DE	1.44962	0.535676	Up
Leaf	148.051	positive	C16518	M(C13)+2H[2+]	0.000489633	0.57065	-0.809322	Down	1	0	Non-DE	0.69719	-0.520376	Down	1.22175	0.288946	Up
Leaf	149.048	positive	C03742	M[1+]	0.000108127	0.56957	-0.812055	Down	1	0	Non-DE	0.71429	-0.485418	Down	1.25409	0.326637	Up
Leaf	150.058	positive	C00073	M+H[1+]	0.000325058	0.26587	-1.91121	Down	1	0	Non-DE	10.291	3.36331	Up	38.7069	5.27452	Up
Leaf	150.065	positive	C00449	M+H+Na[2+]	0.000195542	0.39526	-1.33913	Down	1	0	Non-DE	1	0	Non-DE	2.52998	1.33913	Up
Leaf	151.041	positive	C06032	M(Cl37)+H[1+]	0.000240467	0.50258	-0.992575	Down	1	0	Non-DE	0.61332	-0.705288	Down	1.22034	0.287287	Up
Leaf	152.056	positive	C00242	M+H[1+]	0.000392574	0.24069	-2.05475	Down	0.251	-1.99424	Down	1	0	Non-DE	1.04284	0.0605112	Up
Leaf	158.044	positive	C17758	M-C3H4O2+H[1+]	0.000385067	0.24248	-2.04406	Down	0.327	-1.61264	Down	1	0	Non-DE	1.34856	0.431425	Up
Leaf	158.046	negative	C00042	M+ACN-H[-]	0.000201113	1	0	Non-DE	1	0	Non-DE	0.18867	-2.40606	Down	0.18867	-2.40606	Down
Leaf	159.076	positive	C00327	M-NH3+H[1+]	0.000264064	1	0	Non-DE	1	0	Non-DE	0.086773	-3.52661	Down	0.086773	-3.52661	Down
Leaf	161.045	negative	C00141	M+HCOO[-]	4.6278e-05	0.29524	-1.76004	Down	0.042	-4.57347	Down	1	0	Non-DE	0.142257	-2.81343	Down
Leaf	162.076	positive	C00624	M-CO+H[1+]	8.77338e-05	1	0	Non-DE	1	0	Non-DE	27.049	4.7575	Up	27.049	4.7575	Up
Leaf	163.007	negative	C01180	M-H+O[-]	0.000132455	0.078553	-3.67019	Down	0.005	-7.64386	Down	1	0	Non-DE	0.0636513	-3.97367	Down
Leaf	163.04	negative	C05608	M-H+O[-]	0.000149733	0.3223	-1.63352	Down	0.019	-5.71786	Down	1	0	Non-DE	0.0589513	-4.08433	Down
Leaf	163.06	positive	C00944	M-CO+H[1+]	0.000116919	0.087009	-3.52269	Down	0.513	-0.962969	Down	0.18888	-2.40446	Down	1.11363	0.155264	Up
Leaf	163.06	positive	C00221	M-H2O+H[1+]	2.08828e-05	1	0	Non-DE	0.542	-0.883635	Down	1.3529	0.436055	Up	0.733272	-0.44758	Down
Leaf	163.061	negative	C00794	M-H2O-H[-]	0.000106313	0.081935	-3.60938	Down	0.024	-5.38082	Down	0.25186	-1.98931	Down	0.0737736	-3.76075	Down
Leaf	164.015	negative	C04294	M+Na-2H[-]	0.000308871	0.076456	-3.70923	Down	0.004	-7.96578	Down	1	0	Non-DE	0.0523177	-4.25656	Down
Leaf	164.046	positive	C17211	M(C13)+H[1+]	0.000669233	0.15774	-2.66438	Down	1	0	Non-DE	0.18712	-2.41796	Down	1.18626	0.246415	Up
Leaf	165.055	positive	C19712	M-NH3+H[1+]	1.16668e-05	0.62266	-0.683483	Down	0.341	-1.55216	Down	1	0	Non-DE	0.54765	-0.868673	Down
Leaf	165.056	negative	C12206	M-H[-]	3.43848e-05	0.14916	-2.74507	Down	0.033	-4.92139	Down	1	0	Non-DE	0.221239	-2.17632	Down
Leaf	166.086	positive	C00627	M-HCOOK+H[1+]	0.0001938	1	0	Non-DE	1	0	Non-DE	19.371	4.27583	Up	19.371	4.27583	Up
Leaf	167.059	positive	C00250	M[1+]	0.000334741	0.17542	-2.51111	Down	1	0	Non-DE	0.21357	-2.22722	Down	1.21748	0.283896	Up
Leaf	167.07	positive	C01494	M-CO+H[1+]	0.000128875	0.57714	-0.793007	Down	1	0	Non-DE	5.2591	2.39482	Up	9.11235	3.18782	Up
Leaf	168.05	positive	C20345	M(C13)+H[1+]	0.000137833	0.72786	-0.458267	Down	1	0	Non-DE	1	0	Non-DE	1.37389	0.458267	Up
Leaf	169.05	positive	C13482	M[1+]	0.000157189	0.5289	-0.918933	Down	1	0	Non-DE	0.70456	-0.505206	Down	1.33212	0.413728	Up
Leaf	173.045	negative	C02631	M-H+O[-]	0.000129841	1	0	Non-DE	0.044	-4.50635	Down	1	0	Non-DE	0.044	-4.50635	Down
Leaf	174.076	positive	C01250	M+H[1+]	0.000271712	0.24738	-2.0152	Down	0.341	-1.55216	Down	0.37042	-1.43277	Down	0.510604	-0.969723	Down
Leaf	175.023	positive	C00385	M+Na[1+]	0.000443441	1	0	Non-DE	0.329	-1.60384	Down	1	0	Non-DE	0.329	-1.60384	Down
Leaf	175.047	negative	C00499	M-H[-]	0.000155497	0.02049	-5.60894	Down	0.00019803	-12.302	Down	1	0	Non-DE	0.00966471	-6.69306	Down
Leaf	175.086	positive	C00859	M+2H[2+]	7.12332e-05	0.06568	-3.9284	Down	0.379	-1.39973	Down	0.21127	-2.24284	Down	1.21911	0.285832	Up
Leaf	175.108	positive	C00437	M+H[1+]	0.000192591	1	0	Non-DE	1	0	Non-DE	0.50428	-0.987703	Down	0.50428	-0.987703	Down
Leaf	177.054	positive	C03657	M-CO+H[1+]	0.000234467	1	0	Non-DE	1	0	Non-DE	0.51568	-0.955452	Down	0.51568	-0.955452	Down
Leaf	177.075	positive	C05345	M-HCOOK+H[1+]	0.000301793	0.11401	-3.13277	Down	0.15	-2.73697	Down	0.58974	-0.761849	Down	0.775906	-0.366047	Down
Leaf	179.035	negative	C10945	M-H+O[-]	2.74512e-05	0.15288	-2.70953	Down	0.019	-5.71786	Down	1	0	Non-DE	0.12428	-3.00833	Down
Leaf	180.066	negative	C00079	M-H+O[-]	0.000250234	1	0	Non-DE	1	0	Non-DE	3.5609	1.83224	Up	3.5609	1.83224	Up
Leaf	180.086	positive	C00329	M+H[1+]	0.000439998	1	0	Non-DE	1	0	Non-DE	57.002	5.83294	Up	57.002	5.83294	Up
Leaf	183.084	positive	C17228	M-H4O2+H[1+]	0.000359733	0.0071395	-7.12996	Down	1	0	Non-DE	1	0	Non-DE	140.066	7.12996	Up
Leaf	185.092	positive	C00526	M-CO2+H[1+]	0.000514771	0.11588	-3.1093	Down	0.104	-3.26534	Down	1	0	Non-DE	0.89748	-0.156048	Down
Leaf	187.023	positive	C02514	M+H[1+]	0.000361191	0.17355	-2.52658	Down	0.625	-0.678072	Down	0.31639	-1.66022	Down	1.13941	0.188281	Up
Leaf	187.107	positive	C00534	M+H2O+H[1+]	0.000456805	0.39474	-1.34103	Down	1	0	Non-DE	0.29748	-1.74914	Down	0.75361	-0.40811	Down
Leaf	189.039	positive	C16358	M+Na[1+]	0.000621177	1	0	Non-DE	1	0	Non-DE	0.4306	-1.21558	Down	0.4306	-1.21558	Down
Leaf	191.02	negative	C00311	M-H[-]	0.000128057	0.27901	-1.84161	Down	0.015	-6.05889	Down	1	0	Non-DE	0.0537615	-4.21728	Down
Leaf	191.056	negative	C17220	M(Cl37)-H[-]	0.000188367	0.3868	-1.37034	Down	0.037	-4.75633	Down	1	0	Non-DE	0.0956567	-3.38599	Down
Leaf	191.102	positive	C00666	M+H[1+]	0.000370713	0.33325	-1.58532	Down	1	0	Non-DE	1	0	Non-DE	3.00075	1.58532	Up
Leaf	193.061	negative	C01852	M-2H[2-]	0.000546533	1	0	Non-DE	0.04	-4.64386	Down	1	0	Non-DE	0.04	-4.64386	Down
Leaf	193.071	negative	C00522	M+HCOO[-]	0.000269	0.16768	-2.57622	Down	0.018	-5.79586	Down	0.2556	-1.96804	Down	0.027438	-5.18768	Down
Leaf	195.086	positive	C02504	M+H2O+H[1+]	2.3923e-07	1	0	Non-DE	1	0	Non-DE	0.32033	-1.64237	Down	0.32033	-1.64237	Down
Leaf	196.054	negative	C00257	M(C13)-H[-]	0.000292671	0.26921	-1.8932	Down	0.034	-4.87832	Down	0.42577	-1.23185	Down	0.0537728	-4.21698	Down
Leaf	202.036	negative	C20258	M-H+O[-]	0.000180033	0.15544	-2.68557	Down	0.02	-5.64386	Down	0.48875	-1.03283	Down	0.062886	-3.99112	Down
Leaf	203.02	negative	C16359	M+Na-2H[-]	0.000991856	0.073012	-3.77572	Down	0.028	-5.15843	Down	0.21194	-2.23827	Down	0.0812787	-3.62098	Down
Leaf	203.053	positive	C01801	M+HCOONa[1+]	7.32748e-05	1	0	Non-DE	14	3.80735	Up	1	0	Non-DE	14	3.80735	Up
Leaf	203.067	negative	C05947	M+ACN-H[-]	0.000232833	1	0	Non-DE	1	0	Non-DE	0.076364	-3.71096	Down	0.076364	-3.71096	Down
Leaf	203.081	positive	C06423	M+NaCl[1+]	0.000198077	0.051636	-4.27548	Down	0.427	-1.22769	Down	0.23034	-2.11816	Down	1.90478	0.929624	Up
Leaf	204.087	positive	C00140	M-H2O+H[1+]	4.00162e-05	0.25408	-1.97665	Down	1	0	Non-DE	0.14878	-2.74875	Down	0.585564	-0.772102	Down
Leaf	205.035	negative	C00322	M+HCOO[-]	0.000104534	0.20043	-2.31883	Down	0.043	-4.53952	Down	0.1775	-2.49411	Down	0.0380806	-4.7148	Down
Leaf	205.082	positive	C02880	M+3H[3+]	0.000634383	1	0	Non-DE	1	0	Non-DE	0.10586	-3.23977	Down	0.10586	-3.23977	Down
Leaf	205.118	positive	C21015	M-CO+H[1+]	0.000314567	0.071435	-3.80723	Down	1	0	Non-DE	0.086793	-3.52628	Down	1.21499	0.280948	Up
Leaf	206.094	positive	C17224	M(C13)+H[1+]	0.000886733	0.32433	-1.62447	Down	1	0	Non-DE	0.40748	-1.2952	Down	1.25637	0.329267	Up
Leaf	207.06	negative	C03719	M+ACN-H[-]	4.13332e-05	1	0	Non-DE	0.051	-4.29336	Down	1	0	Non-DE	0.051	-4.29336	Down
Leaf	207.086	positive	C05382	M-HCOOK+H[1+]	1.42212e-05	1	0	Non-DE	1	0	Non-DE	0.055948	-4.15977	Down	0.055948	-4.15977	Down
Leaf	209.03	negative	C00470	M-H+O[-]	2.54072e-05	1	0	Non-DE	0.053	-4.23786	Down	0.50617	-0.982306	Down	0.026827	-5.22017	Down
Leaf	209.03	negative	C00818	M-H[-]	4.19708e-05	0.15447	-2.6946	Down	0.035	-4.8365	Down	0.18481	-2.43589	Down	0.0418745	-4.57779	Down
Leaf	209.066	negative	C00121	M+CH3COO[-]	0.00028217	0.064425	-3.95624	Down	0.057	-4.13289	Down	0.055548	-4.17012	Down	0.0491461	-4.34678	Down
Leaf	211.133	positive	C08491	M+H[1+]	0.000274209	0.15512	-2.68854	Down	0.29	-1.78588	Down	0.35999	-1.47397	Down	0.673009	-0.571303	Down
Leaf	215.016	positive	C00026	M+HCOONa[1+]	0.000367969	0.65489	-0.610675	Down	1	0	Non-DE	1	0	Non-DE	1.52697	0.610675	Up
Leaf	215.033	negative	C11434	M-H[-]	2.04332e-05	0.2897	-1.78737	Down	0.084	-3.57347	Down	1	0	Non-DE	0.289955	-1.7861	Down
Leaf	215.139	positive	C01909	M+H[1+]	0.000480919	0.18148	-2.46212	Down	1	0	Non-DE	0.31191	-1.6808	Down	1.7187	0.781319	Up
Leaf	217.068	positive	C06007	M+HCOONa[1+]	0.000267639	1	0	Non-DE	6.442	2.68751	Up	1	0	Non-DE	6.442	2.68751	Up
Leaf	218.102	positive	C00357	M-HCOOK+H[1+]	0.000277494	1	0	Non-DE	32.626	5.02795	Up	0.0057125	-7.45166	Down	0.186376	-2.42371	Down
Leaf	218.103	negative	C00864	M-H[-]	0.000142392	0.062781	-3.99353	Down	0.024	-5.38082	Down	0.17219	-2.53793	Down	0.065825	-3.92522	Down
Leaf	219.098	positive	C05770	M+3H[3+]	0.000614996	1	0	Non-DE	1	0	Non-DE	0.059292	-4.07602	Down	0.059292	-4.07602	Down
Leaf	219.984	positive	C05335	M+Na[1+]	0.000352796	0.16416	-2.60683	Down	1	0	Non-DE	0.22534	-2.14982	Down	1.37269	0.457001	Up
Leaf	220.981	positive	C05946	M+NaCl[1+]	0.000842691	0.16618	-2.58918	Down	1	0	Non-DE	0.21451	-2.22088	Down	1.29083	0.368298	Up
Leaf	221.03	negative	C03289	M+HCOO[-]	0.000176	0.11976	-3.06178	Down	0.027	-5.2109	Down	0.17503	-2.51433	Down	0.0394607	-4.66344	Down
Leaf	221.046	negative	C02730	M-H[-]	9.16677e-06	1	0	Non-DE	1	0	Non-DE	0.2546	-1.9737	Down	0.2546	-1.9737	Down
Leaf	221.092	positive	C00643	M+H[1+]	0.000346927	0.052386	-4.25467	Down	1	0	Non-DE	0.22261	-2.16741	Down	4.24942	2.08727	Up
Leaf	222.08	positive	C00504	M(C13)+2H[2+]	0.000832546	0.17414	-2.52168	Down	1	0	Non-DE	1	0	Non-DE	5.74251	2.52168	Up
Leaf	223.046	negative	C17214	M(Cl37)-H[-]	0.000329933	0.13085	-2.93401	Down	0.038	-4.71786	Down	0.14073	-2.829	Down	0.0408692	-4.61284	Down
Leaf	223.061	negative	C05610	M-H+O[-]	9.97332e-05	0.23934	-2.06287	Down	0.075	-3.73697	Down	1	0	Non-DE	0.313362	-1.6741	Down
Leaf	231.045	negative	C00669	M-H2O-H[-]	0.000740509	0.027721	-5.17288	Down	1	0	Non-DE	0.37365	-1.42024	Down	13.479	3.75264	Up
Leaf	237.061	negative	C01115	M+CH3COO[-]	0.0002851	0.12475	-3.00289	Down	0.028	-5.15843	Down	0.24212	-2.04621	Down	0.0543436	-4.20175	Down
Leaf	238.092	positive	C03479	M(C13)+2H[2+]	1.93707e-05	0.088127	-3.50427	Down	1	0	Non-DE	0.21357	-2.22722	Down	2.42343	1.27705	Up
Leaf	239.077	negative	C00095	M+CH3COO[-]	0.000232	0.1902	-2.39441	Down	0.032	-4.96578	Down	0.25087	-1.99499	Down	0.0422074	-4.56636	Down
Leaf	242	positive	C17239	M+NaCl[1+]	0.00107667	0.57846	-0.789711	Down	1	0	Non-DE	1	0	Non-DE	1.72873	0.789711	Up
Leaf	243.062	negative	C00299	M-H[-]	4.09408e-05	0.13337	-2.90649	Down	0.016	-5.96578	Down	0.32353	-1.62803	Down	0.0388129	-4.68732	Down
Leaf	243.158	positive	C11512	M+H2O+H[1+]	0.000676473	1	0	Non-DE	1	0	Non-DE	0.37725	-1.40641	Down	0.37725	-1.40641	Down
Leaf	244.092	positive	C00475	M+H[1+]	0.000329367	0.24465	-2.03121	Down	0.366	-1.45008	Down	1	0	Non-DE	1.49601	0.581124	Up
Leaf	246.977	positive	C20440	M-HCOOH+H[1+]	0.000204133	2.399	1.26243	Up	1	0	Non-DE	2.1329	1.09282	Up	0.889079	-0.169617	Down
Leaf	247.042	positive	C01040	M+HCOONa[1+]	0.000143819	1	0	Non-DE	6.079	2.60383	Up	1	0	Non-DE	6.079	2.60383	Up
Leaf	250.072	negative	C05619	M+ACN-H[-]	8.96323e-06	0.026442	-5.24102	Down	0.011	-6.50635	Down	1	0	Non-DE	0.416005	-1.26533	Down
Leaf	253.093	negative	C05401	M-H[-]	0.000242485	1	0	Non-DE	0.03	-5.05889	Down	1	0	Non-DE	0.03	-5.05889	Down
Leaf	255.097	positive	C04874	M[1+]	0.000374471	0.25179	-1.98971	Down	0.211	-2.24469	Down	1	0	Non-DE	0.838	-0.254978	Down
Leaf	256.981	positive	C00093	M+HCOOK[1+]	0.000844999	1	0	Non-DE	3.419	1.77357	Up	1	0	Non-DE	3.419	1.77357	Up
Leaf	259.022	negative	C02985	M-H+O[-]	0.000143337	1	0	Non-DE	0.021	-5.57347	Down	1	0	Non-DE	0.021	-5.57347	Down
Leaf	259.081	positive	C05817	M+H2O+H[1+]	0.000309267	0.62599	-0.675788	Down	0.538	-0.894322	Down	1.6802	0.748633	Up	1.44403	0.5301	Up
Leaf	262.03	positive	C00333	M+HCOONa[1+]	0.000350233	0.3766	-1.4089	Down	1	0	Non-DE	0.52264	-0.936111	Down	1.38779	0.472785	Up
Leaf	264.071	positive	C01300	M+HCOONa[1+]	0.000759733	0.31855	-1.65041	Down	0.373	-1.42275	Down	0.44767	-1.15949	Down	0.524191	-0.931837	Down
Leaf	265.093	negative	C17226	M(Cl37)-H[-]	0.000225633	0.1099	-3.18574	Down	0.018	-5.79586	Down	1	0	Non-DE	0.163785	-2.61012	Down
Leaf	266.065	positive	C19715	M+HCOONa[1+]	0.00115253	3.7846	1.92014	Up	8.01	3.0018	Up	1	0	Non-DE	2.11647	1.08166	Up
Leaf	267.072	negative	C00760	M-2H[2-]	4.83432e-05	0.12625	-2.98564	Down	0.016	-5.96578	Down	0.32671	-1.61392	Down	0.0414048	-4.59406	Down
Leaf	268.104	positive	C00212	M+H[1+]	1.70958e-05	1	0	Non-DE	1	0	Non-DE	3.3518	1.74494	Up	3.3518	1.74494	Up
Leaf	272.113	positive	C04083	M+HCOONa[1+]	0.000792133	0.35058	-1.51218	Down	2.445	1.28983	Up	0.25933	-1.94714	Down	1.80861	0.85488	Up
Leaf	276.072	negative	C03150	M+Na-2H[-]	0.000643766	0.31518	-1.66575	Down	0.038	-4.71786	Down	1	0	Non-DE	0.120566	-3.0521	Down
Leaf	280.139	positive	C08334	M+H2O+H[1+]	7.33118e-05	0.55462	-0.850428	Down	1	0	Non-DE	1	0	Non-DE	1.80304	0.850428	Up
Leaf	281.138	positive	C15514	M+H[1+]	0.000458467	0.39862	-1.32691	Down	1	0	Non-DE	1	0	Non-DE	2.50865	1.32691	Up
Leaf	284.099	positive	C17244	M-CO2+H[1+]	9.92332e-05	0.37069	-1.43171	Down	0.564	-0.826233	Down	1	0	Non-DE	1.52149	0.605482	Up
Leaf	285.221	positive	C04742	M-H4O2+H[1+]	0.000411657	1.5423	0.625083	Up	1	0	Non-DE	1	0	Non-DE	0.648382	-0.625083	Down
Leaf	287.055	positive	C05909	M-H4O2+H[1+]	0.000167667	0.38582	-1.374	Down	1	0	Non-DE	1	0	Non-DE	2.59188	1.374	Up
Leaf	288.058	positive	C05903	M(C13)+H[1+]	0.000346019	2.6454	1.40349	Up	1	0	Non-DE	1	0	Non-DE	0.378015	-1.40349	Down
Leaf	289.07	positive	C06196	M-CO2+H[1+]	0.000319131	0.052314	-4.25666	Down	0.062	-4.01159	Down	1	0	Non-DE	1.18515	0.245071	Up
Leaf	289.215	positive	C06093	M-CO+H[1+]	0.00107073	1.5189	0.603027	Up	1	0	Non-DE	2.3958	1.26051	Up	1.57733	0.657481	Up
Leaf	291.987	positive	C01143	M-NH3+H[1+]	0.000312241	10.298	3.36429	Up	7.081	2.82395	Up	1	0	Non-DE	0.687609	-0.540339	Down
Leaf	292.132	positive	C21016	M(Cl37)+H[1+]	0.000259933	1	0	Non-DE	1	0	Non-DE	3.26	1.70487	Up	3.26	1.70487	Up
Leaf	293.063	positive	C00482	M+HCOONa[1+]	6.87392e-05	1	0	Non-DE	1	0	Non-DE	0.044813	-4.47994	Down	0.044813	-4.47994	Down
Leaf	295.226	positive	C04717	M-H2O+H[1+]	0.000984879	1.6749	0.744075	Up	1	0	Non-DE	1.6647	0.735262	Up	0.99391	-0.00881275	Down
Leaf	297.134	negative	C04498	M+Na-2H[-]	0.00089853	0.20406	-2.29293	Down	0.037	-4.75633	Down	1	0	Non-DE	0.181319	-2.4634	Down
Leaf	301.214	positive	C06427	M+Na[1+]	0.000192771	0.58888	-0.763954	Down	1	0	Non-DE	1	0	Non-DE	1.69814	0.763954	Up
Leaf	303.049	positive	C00130	M-HCOOH+H[1+]	0.000421609	0.24015	-2.05799	Down	1	0	Non-DE	1	0	Non-DE	4.16406	2.05799	Up
Leaf	305.07	negative	C00127	M-2H[2-]	0.00114432	0.034554	-4.855	Down	0.0002722	-11.843	Down	1	0	Non-DE	0.00787753	-6.98804	Down
Leaf	306.998	negative	C11811	M+HCOO[-]	0.0006891	0.073282	-3.7704	Down	0.023	-5.44222	Down	0.056575	-4.14369	Down	0.0177564	-5.81552	Down
Leaf	309.097	positive	C10434	M-CO+H[1+]	0.000282255	0.52289	-0.935421	Down	0.317	-1.65745	Down	1	0	Non-DE	0.606246	-0.722025	Down
Leaf	309.279	positive	C20681	M+H2O+H[1+]	0.000147267	0.2149	-2.21826	Down	1	0	Non-DE	0.2771	-1.85152	Down	1.28944	0.366741	Up
Leaf	311.098	negative	C05512	M+CH3COO[-]	0.000801482	0.13769	-2.8605	Down	0.019	-5.71786	Down	1	0	Non-DE	0.137991	-2.85735	Down
Leaf	313.274	positive	G13038	M+3H[3+]	8.54334e-05	1.6852	0.75292	Up	0.564	-0.826233	Down	1.9412	0.956949	Up	0.649678	-0.622204	Down
Leaf	321.315	positive	C19623	M-H4O2+H[1+]	0.000236567	0.20399	-2.29343	Down	1	0	Non-DE	0.23513	-2.08847	Down	1.15265	0.20496	Up
Leaf	325.113	positive	C00089	M-H2O+H[1+]	3.18723e-06	0.45527	-1.13521	Down	1	0	Non-DE	1.3313	0.412836	Up	2.9242	1.54804	Up
Leaf	327.109	negative	C05855	M-H+O[-]	0.000305067	0.13327	-2.90758	Down	0.03	-5.05889	Down	2.7635	1.4665	Up	0.622083	-0.684821	Down
Leaf	327.304	positive	G00092	M(Cl37)+H[1+]	0.000339967	1	0	Non-DE	1	0	Non-DE	3.7954	1.92425	Up	3.7954	1.92425	Up
Leaf	333.09	positive	C16517	M-H4O2+H[1+]	7.69332e-05	0.43897	-1.18781	Down	1	0	Non-DE	0.50171	-0.995074	Down	1.14293	0.192731	Up
Leaf	333.153	positive	C00933	M+Na[1+]	0.00162575	0.59997	-0.737038	Down	1	0	Non-DE	0.63213	-0.661707	Down	1.0536	0.0753309	Up
Leaf	335.064	positive	C00455	M+H[1+]	0.000327245	0.0069756	-7.16347	Down	1	0	Non-DE	0.09835	-3.34593	Down	14.0991	3.81754	Up
Leaf	337.044	negative	C00364	M-H+O[-]	0.000152911	0.023884	-5.38781	Down	0.012	-6.38082	Down	0.041605	-4.5871	Down	0.0209035	-5.58011	Down
Leaf	338.097	negative	C12208	M(C13)-H[-]	0.000209567	0.080495	-3.63496	Down	0.008	-6.96578	Down	1	0	Non-DE	0.0993851	-3.33083	Down
Leaf	338.281	positive	C01120	M-CO2+H[1+]	0.000871274	2.0576	1.04096	Up	1	0	Non-DE	1	0	Non-DE	0.486003	-1.04096	Down
Leaf	339.773	positive	C16331	M(C13)+3H[3+]	6.38924e-05	1.7896	0.839637	Up	1	0	Non-DE	1.8587	0.894294	Up	1.03861	0.0546568	Up
Leaf	341.088	negative	C05839	M-H+O[-]	4.68148e-05	0.052411	-4.25399	Down	0.019	-5.71786	Down	1	0	Non-DE	0.362519	-1.46387	Down
Leaf	342.308	positive	G00146	M+H[1+]	0.00114143	3.0163	1.59278	Up	1	0	Non-DE	2.8888	1.53047	Up	0.95773	-0.0623096	Down
Leaf	345.133	positive	C11870	M-H2O+H[1+]	0.000165433	10.528	3.39616	Up	1	0	Non-DE	13.397	3.74384	Up	1.27251	0.347679	Up
Leaf	346.149	positive	C16443	M-H4O2+H[1+]	0.00153636	0.60223	-0.731614	Down	1	0	Non-DE	3.6072	1.85088	Up	5.98974	2.58249	Up
Leaf	351.252	positive	C00712	M+HCOONa[1+]	0.001731	1.954	0.96643	Up	1	0	Non-DE	1	0	Non-DE	0.511771	-0.96643	Down
Leaf	352.116	positive	C03451	M-CO+H[1+]	0.00144342	0.93442	-0.0978569	Down	1	0	Non-DE	1	0	Non-DE	1.07018	0.0978569	Up
Leaf	353.266	positive	C01530	M+HCOONa[1+]	0.000133963	1	0	Non-DE	0.741	-0.432455	Down	1	0	Non-DE	0.741	-0.432455	Down
Leaf	354.024	positive	C03373	M+NaCl[1+]	0.0016766	5.1267	2.35803	Up	14.829	3.89035	Up	1	0	Non-DE	2.8925	1.53232	Up
Leaf	355.067	negative	C02887	M-H+O[-]	0.000213467	1	0	Non-DE	0.045	-4.47393	Down	1	0	Non-DE	0.045	-4.47393	Down
Leaf	357.104	negative	C05402	M-H+O[-]	1.99332e-05	1	0	Non-DE	0.039	-4.68038	Down	1	0	Non-DE	0.039	-4.68038	Down
Leaf	367.247	positive	C19418	M+HCOONa[1+]	0.00175308	1.5498	0.632082	Up	1	0	Non-DE	1.9321	0.95017	Up	1.24668	0.318088	Up
Leaf	368.174	positive	C16321	M+NaCl[1+]	0.00125863	1	0	Non-DE	1	0	Non-DE	0.15472	-2.69227	Down	0.15472	-2.69227	Down
Leaf	369.352	positive	C01189	M-H2O+H[1+]	2.37392e-05	1.9738	0.980976	Up	1	0	Non-DE	1.5351	0.618333	Up	0.777738	-0.362643	Down
Leaf	371.062	negative	C04454	M-H+O[-]	0.000690593	0.076731	-3.70405	Down	0.009	-6.79586	Down	1	0	Non-DE	0.117293	-3.09181	Down
Leaf	376.26	positive	C12144	M+NaCl[1+]	0.00103691	0.0017671	-9.1444	Down	1	0	Non-DE	0.0047058	-7.73134	Down	2.66301	1.41306	Up
Leaf	379.281	positive	C20692	M(Cl37)+H[1+]	0.000331733	1	0	Non-DE	0.431	-1.21424	Down	1	0	Non-DE	0.431	-1.21424	Down
Leaf	380.129	negative	C00019	M-H2O-H[-]	0.0015094	1	0	Non-DE	0.058	-4.1078	Down	0.54928	-0.864386	Down	0.0318582	-4.97219	Down
Leaf	380.284	positive	C14156	M-NH3+H[1+]	0.000849333	1	0	Non-DE	0.541	-0.8863	Down	1	0	Non-DE	0.541	-0.8863	Down
Leaf	381.131	negative	C10646	M+Na-2H[-]	0.000703966	1	0	Non-DE	0.058	-4.1078	Down	0.52959	-0.917052	Down	0.0307162	-5.02486	Down
Leaf	381.298	positive	C06425	M+HCOONa[1+]	8.42092e-05	1	0	Non-DE	0.575	-0.798366	Down	1	0	Non-DE	0.575	-0.798366	Down
Leaf	383.12	negative	C00448	M(S34)-H[-]	0.000116129	1	0	Non-DE	0.049	-4.35107	Down	1	0	Non-DE	0.049	-4.35107	Down
Leaf	383.242	positive	C19620	M+HCOONa[1+]	0.00170553	2.4382	1.28582	Up	1	0	Non-DE	2.6601	1.41148	Up	1.09101	0.125664	Up
Leaf	384.035	positive	C00458	M-HCOOK+H[1+]	0.00100042	3.3386	1.73924	Up	6.53	2.70708	Up	1.6105	0.687509	Up	3.14999	1.65535	Up
Leaf	391.224	positive	C03242	M+HCOOK[1+]	0.000214799	1.4618	0.547746	Up	1	0	Non-DE	1	0	Non-DE	0.684088	-0.547746	Down
Leaf	392.12	negative	C01137	M+Cl37[-]	0.00147312	1	0	Non-DE	0.041	-4.60823	Down	1	0	Non-DE	0.041	-4.60823	Down
Leaf	393.314	positive	C14155	M-H2O+H[1+]	0.00145865	0.48468	-1.0449	Down	1	0	Non-DE	0.64498	-0.632674	Down	1.33073	0.412222	Up
Leaf	395.367	positive	C02477	M-H4O2+H[1+]	8.16108e-05	2.0624	1.04432	Up	1	0	Non-DE	1.6231	0.698752	Up	0.786996	-0.345572	Down
Leaf	395.368	positive	C21084	M-CO2+H[1+]	0.000498233	1.978	0.984042	Up	1	0	Non-DE	1	0	Non-DE	0.505561	-0.984042	Down
Leaf	397.383	positive	C22121	M-CO+H[1+]	0.000141567	1.5343	0.617581	Up	1	0	Non-DE	1.4644	0.55031	Up	0.954442	-0.0672709	Down
Leaf	397.383	positive	C01943	M-HCOOH+H[1+]	6.37892e-05	1.9741	0.981195	Up	1	0	Non-DE	1.9094	0.933119	Up	0.967226	-0.0480757	Down
Leaf	399.304	positive	C00828	M-HCOOH+H[1+]	0.000916295	1.9838	0.988267	Up	1	0	Non-DE	1	0	Non-DE	0.504083	-0.988267	Down
Leaf	400.365	positive	C15777	M(C13)+H[1+]	0.000185561	5.9636	2.57618	Up	1	0	Non-DE	2.7998	1.48532	Up	0.469482	-1.09086	Down
Leaf	401.146	negative	C00761	M+CH3COO[-]	0.00089822	1	0	Non-DE	0.028	-5.15843	Down	1	0	Non-DE	0.028	-5.15843	Down
Leaf	402.088	positive	C04352	M[1+]	0.00147995	1	0	Non-DE	0.264	-1.92139	Down	1	0	Non-DE	0.264	-1.92139	Down
Leaf	405.224	positive	C05966	M+HCOONa[1+]	0.000589579	0.54423	-0.877712	Down	1	0	Non-DE	1	0	Non-DE	1.83746	0.877712	Up
Leaf	409.329	positive	C08281	M+HCOONa[1+]	0.000335081	1	0	Non-DE	1	0	Non-DE	1.4164	0.502229	Up	1.4164	0.502229	Up
Leaf	409.347	positive	C13309	M-CO+H[1+]	0.000287981	2.8887	1.53042	Up	1	0	Non-DE	2.0655	1.04649	Up	0.715028	-0.483929	Down
Leaf	413.341	positive	C16253	M-H2O+H[1+]	4.47332e-05	0.55836	-0.840733	Down	1	0	Non-DE	0.64217	-0.638973	Down	1.1501	0.20176	Up
Leaf	415.357	positive	C15780	M+H2O+H[1+]	0.000344403	6.7639	2.75786	Up	1	0	Non-DE	1	0	Non-DE	0.147844	-2.75786	Down
Leaf	415.386	positive	G00093	M-C3H4O2+H[1+]	0.000225533	1.5886	0.667756	Up	1	0	Non-DE	1	0	Non-DE	0.629485	-0.667756	Down
Leaf	415.394	positive	C01753	M+H[1+]	0.000559803	1	0	Non-DE	1	0	Non-DE	4.1933	2.06809	Up	4.1933	2.06809	Up
Leaf	418.376	positive	C15883	M(C13)+H[1+]	0.000190767	29.378	4.87666	Up	1	0	Non-DE	7.8681	2.97602	Up	0.267823	-1.90065	Down
Leaf	421.218	positive	C00427	M+HCOONa[1+]	0.0014052	1	0	Non-DE	1	0	Non-DE	1.5867	0.666029	Up	1.5867	0.666029	Up
Leaf	423.399	positive	C08830	M-H2O+H[1+]	0.000818133	89.282	6.4803	Up	1	0	Non-DE	1	0	Non-DE	0.0112005	-6.4803	Down
Leaf	425.248	positive	C05951	M-C3H4O2+H[1+]	0.000879943	2.0955	1.06729	Up	1	0	Non-DE	2.6639	1.41354	Up	1.27125	0.346245	Up
Leaf	425.342	positive	C14153	M+H[1+]	0.000382781	5.7266	2.51768	Up	1	0	Non-DE	4.5528	2.18675	Up	0.795027	-0.330925	Down
Leaf	425.378	positive	C03313	M-CO+H[1+]	2.02532e-05	1.8346	0.875466	Up	1	0	Non-DE	1.6971	0.763072	Up	0.925052	-0.112394	Down
Leaf	429.373	positive	C11508	M+H2O+H[1+]	4.79608e-05	1	0	Non-DE	1	0	Non-DE	0.42575	-1.23192	Down	0.42575	-1.23192	Down
Leaf	430.319	positive	C15792	M-NH3+H[1+]	0.00138237	1.6075	0.684819	Up	1	0	Non-DE	1.4938	0.578987	Up	0.929269	-0.105832	Down
Leaf	433.113	positive	C12137	M[1+]	1.7e-06	0.39053	-1.35649	Down	0.572	-0.805913	Down	0.6031	-0.729531	Down	0.883346	-0.178949	Down
Leaf	434.116	positive	C16911	M(C13)+H[1+]	9.17668e-05	0.37506	-1.41481	Down	0.575	-0.798366	Down	0.5712	-0.807932	Down	0.8757	-0.191492	Down
Leaf	435.36	positive	C15782	M+Na[1+]	0.000142267	0.62235	-0.684202	Down	1	0	Non-DE	0.52315	-0.934703	Down	0.840604	-0.250501	Down
Leaf	435.361	positive	C22116	M-H4O2+H[1+]	0.00109817	0.61963	-0.690521	Down	1	0	Non-DE	0.50654	-0.981252	Down	0.817488	-0.290731	Down
Leaf	437.375	positive	C15915	M+Na[1+]	6.84888e-05	0.44373	-1.17225	Down	1	0	Non-DE	0.55998	-0.836553	Down	1.26198	0.335693	Up
Leaf	438.979	positive	C01245	M+H2O+H[1+]	0.00109001	1	0	Non-DE	0.435	-1.20091	Down	1	0	Non-DE	0.435	-1.20091	Down
Leaf	439.076	negative	C20454	M+Br[-]	0.0008518	0.19823	-2.33475	Down	0.027	-5.2109	Down	0.54322	-0.880391	Down	0.0739895	-3.75654	Down
Leaf	439.357	positive	C22120	M-H2O+H[1+]	0.000170967	3.105	1.63459	Up	1	0	Non-DE	3.1225	1.6427	Up	1.00564	0.0081083	Up
Leaf	443.305	positive	C05437	M+NaCl[1+]	0.000102803	2.2449	1.16665	Up	1	0	Non-DE	1	0	Non-DE	0.445454	-1.16665	Down
Leaf	445.348	positive	C22119	M(S34)+H[1+]	7.30668e-05	2.8585	1.51526	Up	1	0	Non-DE	2.4052	1.26616	Up	0.84142	-0.249101	Down
Leaf	449.108	positive	C01750	M+H[1+]	3.21488e-05	0.39155	-1.35273	Down	0.54	-0.888969	Down	1	0	Non-DE	1.37913	0.463763	Up
Leaf	449.318	positive	C22123	M+K[1+]	0.000718733	5.9518	2.57333	Up	1	0	Non-DE	7.0667	2.82104	Up	1.18732	0.247711	Up
Leaf	449.375	positive	C01054	M+Na[1+]	0.000498589	2.7487	1.45875	Up	1	0	Non-DE	1.7688	0.822771	Up	0.643504	-0.635979	Down
Leaf	451.358	positive	C15791	M(S34)+H[1+]	0.000222167	1	0	Non-DE	1	0	Non-DE	2.419	1.27441	Up	2.419	1.27441	Up
Leaf	455.116	positive	C01175	M+HCOONa[1+]	3.74332e-05	0.10471	-3.25553	Down	0.348	-1.52284	Down	1	0	Non-DE	3.32346	1.73269	Up
Leaf	455.351	positive	C15800	M+Na[1+]	0.00100003	3.663	1.87303	Up	1	0	Non-DE	3.2514	1.70106	Up	0.887633	-0.171965	Down
Leaf	463.075	positive	C03794	M[1+]	0.000485745	2.9984	1.58419	Up	1	0	Non-DE	1	0	Non-DE	0.333511	-1.58419	Down
Leaf	465.103	positive	C05623	M+H[1+]	0.000233571	0.23352	-2.09838	Down	1	0	Non-DE	1	0	Non-DE	4.28229	2.09838	Up
Leaf	465.35	positive	C11523	M+K[1+]	0.00110893	0.60602	-0.722563	Down	1	0	Non-DE	1	0	Non-DE	1.65011	0.722563	Up
Leaf	468.128	positive	C08604	M+H2O+H[1+]	0.00221992	0.074649	-3.74373	Down	1	0	Non-DE	0.073197	-3.77207	Down	0.980549	-0.0283384	Down
Leaf	471.347	positive	C15793	M+Na[1+]	0.00230231	17.785	4.15259	Up	1	0	Non-DE	15.995	3.99955	Up	0.899353	-0.15304	Down
Leaf	473.339	positive	C15801	M+K[1+]	2.91332e-05	0.3363	-1.57218	Down	1	0	Non-DE	0.3955	-1.33825	Down	1.17603	0.233929	Up
Leaf	474.174	positive	C00445	M+H2O+H[1+]	0.000576094	0.26971	-1.89052	Down	1	0	Non-DE	0.28877	-1.79201	Down	1.07067	0.0985119	Up
Leaf	479.386	positive	C00751	M+HCOONa[1+]	0.000134633	3.3857	1.75945	Up	1	0	Non-DE	2.4761	1.30807	Up	0.731341	-0.451385	Down
Leaf	483.344	positive	C15796	M+HCOONa[1+]	0.000351667	25.93	4.69655	Up	1	0	Non-DE	21.547	4.42942	Up	0.830968	-0.267135	Down
Leaf	489.312	positive	C02059	M+K[1+]	0.000170283	0.59306	-0.75375	Down	1	0	Non-DE	0.75653	-0.402531	Down	1.27564	0.351219	Up
Leaf	489.357	positive	C15803	M+Na[1+]	0.00223403	1.5041	0.5889	Up	0.135	-2.88897	Down	8.4857	3.08503	Up	0.761631	-0.392836	Down
Leaf	496.34	positive	C19874	M[1+]	0.000267	2.3574	1.2372	Up	1	0	Non-DE	1.6026	0.680414	Up	0.679817	-0.556782	Down
Leaf	500.919	negative	C11555	M(Cl37)-H[-]	0.000733011	0.27279	-1.87414	Down	0.028	-5.15843	Down	1	0	Non-DE	0.102643	-3.28429	Down
Leaf	512.148	positive	C00415	M+HCOONa[1+]	0.00205521	0.27369	-1.86939	Down	0.493	-1.02034	Down	0.52966	-0.916862	Down	0.954081	-0.0678166	Down
Leaf	525.375	positive	C08580	M-C3H4O2+H[1+]	0.00206258	5.9312	2.56832	Up	1	0	Non-DE	2.9605	1.56584	Up	0.49914	-1.00248	Down
Leaf	529.404	positive	C13431	M-C3H4O2+H[1+]	0.000223267	1	0	Non-DE	1	0	Non-DE	2.9497	1.56057	Up	2.9497	1.56057	Up
Leaf	536.439	positive	C05433	M[1+]	0.000485197	0.43303	-1.20746	Down	1	0	Non-DE	0.5162	-0.953998	Down	1.19207	0.253463	Up
Leaf	538.446	positive	C05432	M(C13)+H[1+]	0.00265187	0.54615	-0.872631	Down	1	0	Non-DE	0.63383	-0.657832	Down	1.16054	0.214799	Up
Leaf	549.167	negative	C05404	M+HCOO[-]	0.000208124	0.0015617	-9.32267	Down	1	0	Non-DE	1	0	Non-DE	640.328	9.32267	Up
Leaf	553.421	positive	C08592	M(Cl37)+H[1+]	0.000633467	0.63569	-0.653605	Down	0.634	-0.657445	Down	1	0	Non-DE	0.997341	-0.00384055	Down
Leaf	565.048	negative	C02199	M-H+O[-]	8.91872e-05	1	0	Non-DE	1	0	Non-DE	0.18023	-2.47209	Down	0.18023	-2.47209	Down
Leaf	565.193	negative	C03470	M+Cl[-]	0.0020765	1	0	Non-DE	0.006	-7.38082	Down	3.0139	1.59163	Up	0.0180834	-5.78919	Down
Leaf	565.404	positive	C08583	M+H[1+]	0.000352319	1.4962	0.581303	Up	1	0	Non-DE	1	0	Non-DE	0.66836	-0.581303	Down
Leaf	567.42	positive	C15965	M+H[1+]	0.000268933	2.0598	1.0425	Up	1	0	Non-DE	1.6316	0.706287	Up	0.792116	-0.336217	Down
Leaf	568.428	positive	C06098	M[1+]	0.000309964	0.23957	-2.06148	Down	1.396	0.481299	Up	0.15166	-2.72109	Down	0.883739	-0.178308	Down
Leaf	579.172	positive	C09826	M-H2O+H[1+]	0.000705279	0.36488	-1.45451	Down	0.52	-0.943416	Down	1	0	Non-DE	1.42513	0.51109	Up
Leaf	583.464	positive	C05421	M+K[1+]	0.000348233	0.67117	-0.57525	Down	1	0	Non-DE	1	0	Non-DE	1.48994	0.57525	Up
Leaf	586.276	positive	C05913	M(C13)+H[1+]	0.00165973	2.6418	1.40152	Up	1	0	Non-DE	2.6293	1.39468	Up	0.995268	-0.00684249	Down
Leaf	586.434	positive	C08579	M(C13)+H[1+]	0.000158633	3.9965	1.99874	Up	1.825	0.867896	Up	2.1984	1.13645	Up	1.0039	0.00561328	Up
Leaf	593.276	positive	C18021	M+H[1+]	0.000324433	0.38625	-1.37239	Down	1	0	Non-DE	1	0	Non-DE	2.589	1.37239	Up
Leaf	595.166	positive	C08725	M[1+]	0.000196878	0.42687	-1.22813	Down	0.513	-0.962969	Down	1	0	Non-DE	1.20177	0.265162	Up
Leaf	600.418	positive	C08614	M[1+]	3.62e-06	0.2076	-2.26812	Down	1	0	Non-DE	0.3018	-1.72834	Down	1.45376	0.539786	Up
Leaf	601.425	positive	C15968	M+H2O+H[1+]	8.93332e-05	1	0	Non-DE	0.428	-1.22432	Down	1	0	Non-DE	0.428	-1.22432	Down
Leaf	612.164	positive	C19796	M(C13)+H[1+]	0.000151133	0.26337	-1.92484	Down	1	0	Non-DE	1	0	Non-DE	3.79694	1.92484	Up
Leaf	616.248	positive	C02139	M(C13)+H[1+]	0.000677267	1	0	Non-DE	1	0	Non-DE	1.5228	0.606726	Up	1.5228	0.606726	Up
Leaf	617.148	positive	C21854	M+Na[1+]	2.98332e-05	0.83544	-0.259392	Down	0.776	-0.365871	Down	1	0	Non-DE	0.928852	-0.10648	Down
Leaf	617.511	positive	G00108	M(C13)+H[1+]	0.000714433	1	0	Non-DE	0.612	-0.708396	Down	1	0	Non-DE	0.612	-0.708396	Down
Leaf	627.156	positive	C16312	M[1+]	0.000256466	0.037554	-4.73489	Down	0.293	-1.77103	Down	1	0	Non-DE	7.8021	2.96386	Up
Leaf	629.226	positive	C11831	M+H2O+H[1+]	0.000987333	31.547	4.97943	Up	1	0	Non-DE	16.503	4.04466	Up	0.523124	-0.934775	Down
Leaf	629.26	positive	C00461	M(C13)+H[1+]	0.000422554	1	0	Non-DE	1	0	Non-DE	0.29699	-1.75151	Down	0.29699	-1.75151	Down
Leaf	630.229	positive	C16541	M(C13)+H[1+]	0.000833933	22.868	4.51526	Up	1	0	Non-DE	4.4239	2.14532	Up	0.193454	-2.36994	Down
Leaf	632.263	positive	C18070	M+H[1+]	0.00277673	1	0	Non-DE	1	0	Non-DE	0.46186	-1.11447	Down	0.46186	-1.11447	Down
Leaf	639.488	positive	C03427	M-HCOOK+H[1+]	0.00208892	4.0944	2.03365	Up	1	0	Non-DE	1	0	Non-DE	0.244236	-2.03365	Down
Leaf	641.175	negative	C02191	M+Br[-]	0.0012433	0.16606	-2.59022	Down	0.02	-5.64386	Down	0.50964	-0.97245	Down	0.0613802	-4.02608	Down
Leaf	643.19	positive	C03516	M+NaCl[1+]	0.00315917	0.27493	-1.86286	Down	0.473	-1.08009	Down	0.57095	-0.808564	Down	0.982284	-0.0257878	Down
Leaf	647.205	negative	C01613	M-H2O-H[-]	0.000765061	0.1461	-2.77497	Down	0.017	-5.87832	Down	1	0	Non-DE	0.116359	-3.10335	Down
Leaf	667.216	positive	C00500	M+HCOOK[1+]	3.53022e-05	1	0	Non-DE	1	0	Non-DE	0.28078	-1.83249	Down	0.28078	-1.83249	Down
Leaf	667.606	positive	G13074	M+H[1+]	0.00132637	3.9497	1.98174	Up	1	0	Non-DE	1	0	Non-DE	0.253184	-1.98174	Down
Leaf	685.241	positive	C18022	M+NaCl[1+]	0.000893533	0.218	-2.1976	Down	0.403	-1.31115	Down	1	0	Non-DE	1.84862	0.886452	Up
Leaf	702.636	positive	C00381	M+H+Na[2+]	0.001414	1	0	Non-DE	0.338	-1.5649	Down	1	0	Non-DE	0.338	-1.5649	Down
Leaf	711.157	positive	G00013	M+2H[2+]	0.000339467	1	0	Non-DE	1	0	Non-DE	1.683	0.751035	Up	1.683	0.751035	Up
Leaf	752.618	positive	G13039	M+H2O+H[1+]	1.39668e-05	0.17917	-2.4806	Down	1	0	Non-DE	0.09846	-3.34432	Down	0.549534	-0.863719	Down
Leaf	752.642	positive	C16695	M(C13)+H[1+]	0.000208633	2.1383	1.09646	Up	1.695	0.761285	Up	1	0	Non-DE	0.792686	-0.335179	Down
Leaf	767.071	positive	C00006	M+Na[1+]	0.00110304	0.5624	-0.830332	Down	1	0	Non-DE	1	0	Non-DE	1.77809	0.830332	Up
Leaf	769.66	positive	G00004	M+K[1+]	0.00240527	0.52598	-0.92692	Down	1	0	Non-DE	1	0	Non-DE	1.90121	0.92692	Up
Leaf	780.183	positive	C12096	M+Na[1+]	0.00330897	9.4598	3.24181	Up	0.535	-0.902389	Down	5.7225	2.51665	Up	0.323637	-1.62755	Down
Leaf	785.663	positive	G13073	M+K[1+]	0.000354033	1	0	Non-DE	1	0	Non-DE	3.1683	1.66371	Up	3.1683	1.66371	Up
Leaf	793.511	positive	C04145	M(Cl37)+H[1+]	0.000555367	1	0	Non-DE	0.328	-1.60823	Down	2.4961	1.31968	Up	0.818721	-0.288557	Down
Leaf	796.593	positive	G00149	M+HCOONa[1+]	0.00168597	3.0204	1.59474	Up	0.276	-1.85726	Down	5.8485	2.54807	Up	0.534428	-0.903933	Down
Leaf	798.232	positive	C05268	M-HCOOK+H[1+]	0.0027665	0.45677	-1.13046	Down	0.544	-0.878321	Down	0.77485	-0.368011	Down	0.922824	-0.115872	Down
Leaf	821.585	positive	C17570	M+HCOOK[1+]	0.000924433	0.66379	-0.591201	Down	1	0	Non-DE	1	0	Non-DE	1.5065	0.591201	Up
Leaf	858.755	positive	C20690	M+K[1+]	0.00201297	1.8257	0.86845	Up	1	0	Non-DE	2.2599	1.17626	Up	1.23783	0.307809	Up
Leaf	872.168	positive	C06000	M+H2O+H[1+]	0.00236097	0.20603	-2.27907	Down	1	0	Non-DE	0.31318	-1.67494	Down	1.52007	0.604138	Up
Leaf	874.786	positive	G00428	M+Na[1+]	0.00376797	1.8914	0.919455	Up	1	0	Non-DE	1.9095	0.933195	Up	1.00957	0.0137404	Up
Leaf	909.529	positive	C05797	M+K[1+]	7.01668e-05	1	0	Non-DE	1	0	Non-DE	0.6735	-0.57025	Down	0.6735	-0.57025	Down
Leaf	911.533	positive	C18151	M(S34)+H[1+]	0.000156567	0.28924	-1.78966	Down	1	0	Non-DE	0.41811	-1.25805	Down	1.44555	0.531615	Up
Leaf	917.69	positive	G13037	M+Na[1+]	0.000899133	1.3458	0.428464	Up	1	0	Non-DE	1	0	Non-DE	0.743052	-0.428464	Down
Leaf	927.82	positive	G01977	M+H2O+H[1+]	0.00262213	1.2514	0.323543	Up	1.313	0.392867	Up	0.78934	-0.341281	Down	0.828195	-0.271957	Down
Leaf	945.477	positive	C05307	M+K[1+]	3.34323e-06	0.43165	-1.21207	Down	1	0	Non-DE	0.48026	-1.05811	Down	1.11261	0.153954	Up
Leaf	966.286	positive	C03221	M+H2O+H[1+]	0.00175009	0.53729	-0.896227	Down	1	0	Non-DE	1	0	Non-DE	1.86119	0.896227	Up
Leaf	977.504	positive	C05306	M+HCOOK[1+]	0.000231897	0.24768	-2.01345	Down	0.656	-0.608232	Down	0.21481	-2.21887	Down	0.568941	-0.813649	Down
Leaf	1072.24	positive	C16335	M+HCOOK[1+]	0.00523728	1.3393	0.421479	Up	1	0	Non-DE	1.8834	0.913339	Up	1.40626	0.49186	Up
Leaf	1503.41	positive	G00019	M+H[1+]	0.00184047	0.11155	-3.16424	Down	1	0	Non-DE	0.18935	-2.40087	Down	1.69745	0.763365	Up
Roots	79.0389	positive	C00258	M-CO+H[1+]	1.86532e-05	33.889	5.08275	Up	1	0	Non-DE	94.605	6.56384	Up	2.79161	1.4811	Up
Roots	80.0348	positive	C01678	M(Cl37)+H[1+]	0.000378194	0.40361	-1.30897	Down	1	0	Non-DE	0.38015	-1.39536	Down	0.941875	-0.0863931	Down
Roots	85.028	positive	C00074	M-HCOOK+H[1+]	0.000301521	0.40749	-1.29516	Down	1	0	Non-DE	0.44517	-1.16757	Down	1.09247	0.127592	Up
Roots	88.0394	positive	C00049	M-HCOOH+H[1+]	5.11462e-05	0.44288	-1.17501	Down	1	0	Non-DE	0.46034	-1.11923	Down	1.03942	0.055784	Up
Roots	88.0405	negative	C00099	M-H[-]	5.20638e-05	1	0	Non-DE	8.497	3.08695	Up	1	0	Non-DE	8.497	3.08695	Up
Roots	89.0229	positive	C00122	M-CO+H[1+]	0.000334213	1	0	Non-DE	1	0	Non-DE	0.066513	-3.91022	Down	0.066513	-3.91022	Down
Roots	89.024	negative	C00084	M+HCOO[-]	0.00010694	0.26422	-1.92019	Down	0.173	-2.53116	Down	1	0	Non-DE	0.654757	-0.610968	Down
Roots	89.0243	negative	C00163	M-H+O[-]	0.000149189	1	0	Non-DE	1	0	Non-DE	0.50783	-0.977582	Down	0.50783	-0.977582	Down
Roots	95.0519	positive	C00116	M(Cl37)+H[1+]	7.05712e-05	0.22596	-2.14586	Down	1.625	0.70044	Up	0.19106	-2.3879	Down	1.37402	0.458398	Up
Roots	96.0332	positive	C01762	M(C13)+3H[3+]	0.000377439	0.49199	-1.0233	Down	1	0	Non-DE	1	0	Non-DE	2.03256	1.0233	Up
Roots	96.9601	negative	C00059	M-H[-]	4.48248e-05	1	0	Non-DE	0.111	-3.17137	Down	1	0	Non-DE	0.111	-3.17137	Down
Roots	97.0282	positive	C06010	M-H4O2+H[1+]	0.000180501	0.45041	-1.15069	Down	1	0	Non-DE	0.45229	-1.14468	Down	1.00417	0.00600924	Up
Roots	98.0488	positive	C03406	M(C13)+3H[3+]	0.000418753	0.363	-1.46196	Down	1.612	0.688852	Up	0.27942	-1.83949	Down	1.24084	0.311317	Up
Roots	98.984	positive	C00033	M+K[1+]	0.000129721	0.19744	-2.34051	Down	1	0	Non-DE	0.33808	-1.56456	Down	1.71232	0.77595	Up
Roots	100.039	positive	C00441	M-H2O+H[1+]	6.93823e-06	0.35614	-1.48948	Down	1	0	Non-DE	0.28596	-1.80611	Down	0.802943	-0.316631	Down
Roots	102.019	negative	C01417	M+CH3COO[-]	0.000147559	1	0	Non-DE	1	0	Non-DE	0.11744	-3.09	Down	0.11744	-3.09	Down
Roots	102.055	positive	C04281	M-CO+H[1+]	4.68618e-05	0.51175	-0.966489	Down	1	0	Non-DE	1	0	Non-DE	1.95408	0.966489	Up
Roots	103.003	negative	C00011	M+CH3COO[-]	0.000104556	1	0	Non-DE	1	0	Non-DE	0.16534	-2.59649	Down	0.16534	-2.59649	Down
Roots	103.058	positive	C01234	M(C13)+H[1+]	0.00049054	0.4588	-1.12406	Down	1	0	Non-DE	1	0	Non-DE	2.1796	1.12406	Up
Roots	104.034	positive	C02362	M-CO+H[1+]	0.00013872	0.32632	-1.61564	Down	1	0	Non-DE	1	0	Non-DE	3.06448	1.61564	Up
Roots	104.07	positive	C03741	M-CO+H[1+]	0.000141167	1	0	Non-DE	1	0	Non-DE	0.36553	-1.45194	Down	0.36553	-1.45194	Down
Roots	104.107	positive	C00407	M-CO+H[1+]	0.000150968	0.32641	-1.61524	Down	1	0	Non-DE	0.43596	-1.19773	Down	1.33562	0.417511	Up
Roots	106.038	positive	C00680	M+H+Na[2+]	0.000319767	0.35108	-1.51013	Down	1	0	Non-DE	0.28601	-1.80586	Down	0.814658	-0.295734	Down
Roots	106.05	positive	C00065	M+H[1+]	1.49618e-05	0.40092	-1.31861	Down	1	0	Non-DE	0.47609	-1.07069	Down	1.18749	0.24792	Up
Roots	106.065	positive	C00561	M-CO+H[1+]	0.000285818	0.9447	-0.0820718	Down	1	0	Non-DE	0.87819	-0.187395	Down	0.929597	-0.105323	Down
Roots	109.028	positive	C01179	M-C3H4O2+H[1+]	0.000209411	1	0	Non-DE	1	0	Non-DE	0.44766	-1.15952	Down	0.44766	-1.15952	Down
Roots	110.985	negative	C03547	M+Cl[-]	0.000162394	0.10668	-3.22864	Down	0.183	-2.45008	Down	1	0	Non-DE	1.71541	0.778554	Up
Roots	111.007	positive	C00026	M-H4O2+H[1+]	0.000275169	1	0	Non-DE	1	0	Non-DE	0.24828	-2.00996	Down	0.24828	-2.00996	Down
Roots	112.075	positive	C00408	M-H2O+H[1+]	0.000271968	0.17028	-2.55402	Down	1	0	Non-DE	1	0	Non-DE	5.87268	2.55402	Up
Roots	113	positive	C00227	M-CO+H[1+]	8.94877e-06	0.1184	-3.07826	Down	1	0	Non-DE	0.3011	-1.73169	Down	2.54307	1.34657	Up
Roots	113.034	positive	C00106	M+H[1+]	0.000421049	1	0	Non-DE	1	0	Non-DE	0.38586	-1.37385	Down	0.38586	-1.37385	Down
Roots	114.043	positive	C00078	M+H+Na[2+]	5.31142e-05	1	0	Non-DE	1	0	Non-DE	2.1702	1.11783	Up	2.1702	1.11783	Up
Roots	114.102	positive	C00860	M-CO+H[1+]	8.99558e-05	0.39089	-1.35517	Down	1	0	Non-DE	1	0	Non-DE	2.55826	1.35517	Up
Roots	115.003	negative	C00149	M-H2O-H[-]	0.000330535	1	0	Non-DE	0.064	-3.96578	Down	1	0	Non-DE	0.064	-3.96578	Down
Roots	117.029	positive	C00020	M(C13)+3H[3+]	0.000105146	0.094747	-3.39978	Down	1	0	Non-DE	0.089968	-3.47444	Down	0.94956	-0.0746683	Down
Roots	118.05	positive	C00940	M-CO+H[1+]	9.32838e-05	0.57574	-0.796511	Down	1	0	Non-DE	1	0	Non-DE	1.7369	0.796511	Up
Roots	118.051	negative	C01888	M+HCOO[-]	0.000246249	1	0	Non-DE	0.295	-1.76121	Down	1	0	Non-DE	0.295	-1.76121	Down
Roots	118.086	positive	C04076	M-CO+H[1+]	0.00028669	1.7016	0.766892	Up	1.237	0.306846	Up	1.572	0.652601	Up	1.14279	0.192555	Up
Roots	120.08	positive	C00483	M-H2O+H[1+]	0.000260746	0.35454	-1.49598	Down	1	0	Non-DE	1	0	Non-DE	2.82056	1.49598	Up
Roots	123.044	positive	C02631	M-H4O2+H[1+]	0.000223375	0.08646	-3.53182	Down	1	0	Non-DE	0.12074	-3.05002	Down	1.39648	0.481799	Up
Roots	124.015	positive	C05823	M(C13)+H[1+]	0.000150385	0.21018	-2.2503	Down	1.409	0.494672	Up	0.2357	-2.08498	Down	1.58008	0.659998	Up
Roots	124.039	positive	C00253	M+H[1+]	0.000355076	0.18843	-2.4079	Down	1	0	Non-DE	0.32526	-1.62033	Down	1.72616	0.787565	Up
Roots	130.05	positive	C03082	M-HCOOK+H[1+]	8.96938e-05	0.46382	-1.10836	Down	1	0	Non-DE	0.56143	-0.832822	Down	1.21045	0.275541	Up
Roots	130.051	negative	C02659	M+HCOO[-]	0.000164949	1	0	Non-DE	0.039	-4.68038	Down	1	0	Non-DE	0.039	-4.68038	Down
Roots	131.037	positive	C01061	M-HCOONa+H[1+]	0.000262567	2.8571	1.51455	Up	1	0	Non-DE	3.5425	1.82477	Up	1.23989	0.310216	Up
Roots	131.053	positive	C17216	M-HCOOH+H[1+]	4.11332e-05	0.3979	-1.32952	Down	1	0	Non-DE	0.45855	-1.12485	Down	1.15243	0.204673	Up
Roots	131.129	positive	C00179	M+H[1+]	0.000236535	0.35785	-1.48257	Down	1	0	Non-DE	1	0	Non-DE	2.79447	1.48257	Up
Roots	132.065	positive	C06055	M-HCOOK+H[1+]	0.000419858	0.065595	-3.93027	Down	1	0	Non-DE	1	0	Non-DE	15.2451	3.93027	Up
Roots	132.102	positive	C01233	M-HCOOK+H[1+]	0.000142664	0.080324	-3.63803	Down	1	0	Non-DE	0.32418	-1.62513	Down	4.0359	2.01289	Up
Roots	133.014	negative	C00042	M-H+O[-]	0.000235713	1	0	Non-DE	0.06	-4.05889	Down	1	0	Non-DE	0.06	-4.05889	Down
Roots	133.031	positive	C02226	M(Cl37)+H[1+]	0.000313753	0.050666	-4.30284	Down	1	0	Non-DE	0.16061	-2.63837	Down	3.16998	1.66447	Up
Roots	133.06	positive	C02642	M+H[1+]	0.000337599	0.13681	-2.86975	Down	1	0	Non-DE	0.081233	-3.62179	Down	0.593765	-0.752036	Down
Roots	134.081	positive	C00956	M-CO+H[1+]	0.000168112	1	0	Non-DE	0.32	-1.64386	Down	1	0	Non-DE	0.32	-1.64386	Down
Roots	136.051	positive	C02091	M(S34)+H[1+]	0.000450767	0.020717	-5.59304	Down	1.598	0.676267	Up	0.21087	-2.24557	Down	16.2654	4.02373	Up
Roots	136.062	positive	C00147	M+H[1+]	0.000204952	1	0	Non-DE	1	0	Non-DE	0.54642	-0.871918	Down	0.54642	-0.871918	Down
Roots	136.075	positive	C03758	M-H2O+H[1+]	0.000359568	0.10289	-3.28083	Down	1	0	Non-DE	1	0	Non-DE	9.71912	3.28083	Up
Roots	137.063	positive	C03089	M-CO2+H[1+]	0.000312171	0.49555	-1.0129	Down	1	0	Non-DE	0.52215	-0.937464	Down	1.05368	0.0754337	Up
Roots	138.055	positive	C00108	M+H[1+]	2.17398e-05	0.25076	-1.99562	Down	1	0	Non-DE	1	0	Non-DE	3.98788	1.99562	Up
Roots	143.001	positive	C11537	M-CO+H[1+]	0.000652033	3.6614	1.8724	Up	1	0	Non-DE	16.034	4.00306	Up	4.3792	2.13067	Up
Roots	144.065	positive	C03972	M-CO+H[1+]	0.000185148	0.1636	-2.61176	Down	1	0	Non-DE	0.083911	-3.575	Down	0.512903	-0.963241	Down
Roots	145.049	positive	C00221	M-H4O2+H[1+]	6.21828e-05	0.018124	-5.78595	Down	1	0	Non-DE	0.036453	-4.77782	Down	2.01131	1.00814	Up
Roots	145.068	positive	C17246	M-NH3+H[1+]	0.000108467	1	0	Non-DE	1	0	Non-DE	0.068481	-3.86815	Down	0.068481	-3.86815	Down
Roots	146.035	positive	C00555	M+NaCl[1+]	0.000339333	0.50992	-0.971657	Down	1.377	0.461529	Up	0.37889	-1.40015	Down	1.02316	0.0330367	Up
Roots	146.046	negative	C00025	M-H[-]	0.000126686	0.22308	-2.16437	Down	0.2	-2.32193	Down	0.25838	-1.95243	Down	0.231648	-2.10999	Down
Roots	147.028	positive	C00417	M-CO+H[1+]	0.000257191	1	0	Non-DE	1	0	Non-DE	0.16319	-2.61538	Down	0.16319	-2.61538	Down
Roots	147.033	positive	C17238	M+H+Na[2+]	0.000648833	0.57947	-0.787194	Down	1.439	0.525067	Up	0.4218	-1.24537	Down	1.04746	0.0668917	Up
Roots	147.065	positive	C04236	M-CO+H[1+]	0.000123997	1	0	Non-DE	1	0	Non-DE	0.14606	-2.77537	Down	0.14606	-2.77537	Down
Roots	148.051	positive	C16518	M(C13)+2H[2+]	0.000489633	0.81561	-0.294049	Down	1	0	Non-DE	0.69287	-0.529343	Down	0.849511	-0.235295	Down
Roots	149.045	negative	C01801	M-H+O[-]	8.86412e-05	1	0	Non-DE	0.266	-1.9105	Down	2.789	1.47975	Up	0.741874	-0.430754	Down
Roots	149.048	positive	C03742	M[1+]	0.000108127	0.81882	-0.288382	Down	1	0	Non-DE	0.69742	-0.5199	Down	0.851738	-0.231519	Down
Roots	150.058	positive	C00073	M+H[1+]	0.000325058	0.070243	-3.8315	Down	1	0	Non-DE	0.027068	-5.20727	Down	0.385348	-1.37577	Down
Roots	150.065	positive	C00449	M+H+Na[2+]	0.000195542	0.15111	-2.72633	Down	1	0	Non-DE	0.23307	-2.10116	Down	1.54239	0.625164	Up
Roots	151.041	positive	C06032	M(Cl37)+H[1+]	0.000240467	0.51319	-0.962435	Down	1.231	0.299831	Up	0.36033	-1.47261	Down	0.864331	-0.210344	Down
Roots	152.056	positive	C00242	M+H[1+]	0.000409674	0.51838	-0.947918	Down	1	0	Non-DE	0.36925	-1.43733	Down	0.712315	-0.489412	Down
Roots	158.045	positive	C17758	M-C3H4O2+H[1+]	0.000297367	0.055437	-4.17301	Down	1	0	Non-DE	1	0	Non-DE	18.0385	4.17301	Up
Roots	159.076	positive	C00327	M-NH3+H[1+]	0.000264064	0.1814	-2.46275	Down	1	0	Non-DE	0.083783	-3.5772	Down	0.461869	-1.11445	Down
Roots	159.077	negative	C00188	M+ACN-H[-]	0.000161892	1	0	Non-DE	0.132	-2.92139	Down	1	0	Non-DE	0.132	-2.92139	Down
Roots	160.079	positive	C17217	M-H2O+H[1+]	0.000112033	0.47301	-1.08006	Down	1	0	Non-DE	1	0	Non-DE	2.11412	1.08006	Up
Roots	161.045	negative	C00141	M+HCOO[-]	4.6278e-05	0.24433	-2.0331	Down	0.289	-1.79086	Down	0.090984	-3.45824	Down	0.107618	-3.216	Down
Roots	163.007	negative	C01180	M-H+O[-]	0.000132455	0.23513	-2.08847	Down	0.424	-1.23786	Down	0.16217	-2.62442	Down	0.292434	-1.77382	Down
Roots	163.04	negative	C05608	M-H+O[-]	0.000241033	0.2109	-2.24537	Down	0.377	-1.40736	Down	0.15629	-2.6777	Down	0.27938	-1.8397	Down
Roots	163.06	positive	C00944	M-CO+H[1+]	0.000116919	0.030214	-5.04864	Down	1	0	Non-DE	0.014592	-6.09868	Down	0.482955	-1.05004	Down
Roots	164.046	positive	C17211	M(C13)+H[1+]	0.000669233	0.20557	-2.2823	Down	1.729	0.789938	Up	0.13856	-2.85142	Down	1.16539	0.220819	Up
Roots	164.071	negative	C00079	M-H[-]	0.000702934	1	0	Non-DE	1	0	Non-DE	0.022031	-5.50432	Down	0.022031	-5.50432	Down
Roots	165.055	positive	C10945	M+H[1+]	7.53848e-05	0.38708	-1.3693	Down	1	0	Non-DE	0.30487	-1.71373	Down	0.787615	-0.344438	Down
Roots	165.055	positive	C19712	M-NH3+H[1+]	1.16668e-05	0.21314	-2.23013	Down	1	0	Non-DE	1	0	Non-DE	4.69175	2.23013	Up
Roots	165.055	negative	C00601	M+HCOO[-]	0.000262022	1	0	Non-DE	1	0	Non-DE	0.094703	-3.40045	Down	0.094703	-3.40045	Down
Roots	166.086	positive	C00627	M-HCOOK+H[1+]	0.0001938	0.29664	-1.75321	Down	1	0	Non-DE	1	0	Non-DE	3.37109	1.75321	Up
Roots	167.059	positive	C00250	M[1+]	0.000334741	0.23315	-2.10067	Down	1.363	0.446786	Up	0.16663	-2.58528	Down	0.974123	-0.0378247	Down
Roots	167.07	positive	C01494	M-CO+H[1+]	0.000128875	0.15248	-2.71331	Down	1	0	Non-DE	0.21027	-2.24969	Down	1.379	0.463623	Up
Roots	168.05	positive	C20345	M(C13)+H[1+]	0.000137833	1	0	Non-DE	1.288	0.365133	Up	0.6666	-0.585107	Down	0.858581	-0.219974	Down
Roots	169.05	positive	C13482	M[1+]	0.000157189	0.64995	-0.621599	Down	1	0	Non-DE	0.49163	-1.02436	Down	0.756412	-0.402756	Down
Roots	171.048	positive	C02887	M+2H[2+]	0.000814933	0.23794	-2.07133	Down	1	0	Non-DE	1	0	Non-DE	4.20274	2.07133	Up
Roots	174.076	positive	C01250	M+H[1+]	0.000271712	0.02094	-5.57759	Down	1	0	Non-DE	0.22241	-2.16871	Down	10.6213	3.40889	Up
Roots	175.108	positive	C00437	M+H[1+]	0.000192591	0.30915	-1.69362	Down	1	0	Non-DE	1	0	Non-DE	3.23468	1.69362	Up
Roots	177.039	positive	C00470	M-H2O+H[1+]	0.000169241	4.5028	2.17082	Up	1	0	Non-DE	5.4838	2.45518	Up	1.21786	0.284354	Up
Roots	180.086	positive	C00329	M+H[1+]	0.000442998	2.9323	1.55203	Up	1	0	Non-DE	3.0552	1.61127	Up	1.04191	0.0592341	Up
Roots	185.022	negative	C00121	M+Cl[-]	0.00013673	0.036992	-4.75664	Down	0.195	-2.35845	Down	0.055454	-4.17256	Down	0.292321	-1.77438	Down
Roots	187.023	positive	C02514	M+H[1+]	0.000361191	0.15755	-2.66612	Down	1	0	Non-DE	0.14408	-2.79506	Down	0.914503	-0.12894	Down
Roots	187.107	positive	C00534	M+H2O+H[1+]	0.000456805	0.24525	-2.02767	Down	1	0	Non-DE	0.22919	-2.12538	Down	0.934516	-0.097709	Down
Roots	191.02	negative	C00311	M-H[-]	0.000128057	1	0	Non-DE	1	0	Non-DE	0.24775	-2.01304	Down	0.24775	-2.01304	Down
Roots	191.102	positive	C00666	M+H[1+]	0.000322113	0.132	-2.92139	Down	1	0	Non-DE	0.0076905	-7.02271	Down	0.0582614	-4.10132	Down
Roots	193.071	negative	C00522	M+HCOO[-]	0.000269	1	0	Non-DE	0.184	-2.44222	Down	1	0	Non-DE	0.184	-2.44222	Down
Roots	195.086	positive	C02504	M+H2O+H[1+]	2.3923e-07	0.49602	-1.01153	Down	1	0	Non-DE	0.41118	-1.28216	Down	0.828959	-0.270628	Down
Roots	196.054	negative	C00257	M(C13)-H[-]	0.000292671	0.087335	-3.5173	Down	1	0	Non-DE	0.17167	-2.54229	Down	1.96565	0.975006	Up
Roots	203.02	negative	C16359	M+Na-2H[-]	0.000991856	0.2041	-2.29265	Down	0.279	-1.84166	Down	0.2297	-2.12218	Down	0.313995	-1.67119	Down
Roots	203.067	negative	C05947	M+ACN-H[-]	0.000178833	1	0	Non-DE	0.101	-3.30757	Down	1	0	Non-DE	0.101	-3.30757	Down
Roots	204.087	positive	C00140	M-H2O+H[1+]	4.00162e-05	0.35756	-1.48374	Down	1	0	Non-DE	0.4484	-1.15714	Down	1.25406	0.326601	Up
Roots	205.082	positive	C02880	M+3H[3+]	0.000634383	0.1915	-2.38458	Down	1	0	Non-DE	0.091263	-3.45383	Down	0.476569	-1.06924	Down
Roots	205.118	positive	C21015	M-CO+H[1+]	0.000314567	0.084055	-3.57252	Down	1	0	Non-DE	0.016944	-5.88308	Down	0.201582	-2.31056	Down
Roots	206.082	negative	C12206	M+ACN-H[-]	3.54848e-05	1	0	Non-DE	1	0	Non-DE	0.12027	-3.05565	Down	0.12027	-3.05565	Down
Roots	206.094	positive	C17224	M(C13)+H[1+]	0.000886733	0.41417	-1.27171	Down	1.585	0.664483	Up	0.28956	-1.78807	Down	1.10813	0.148122	Up
Roots	207.06	negative	C03719	M+ACN-H[-]	4.13332e-05	1	0	Non-DE	0.319	-1.64837	Down	1	0	Non-DE	0.319	-1.64837	Down
Roots	207.086	positive	C05382	M-HCOOK+H[1+]	1.42212e-05	0.058968	-4.08392	Down	1	0	Non-DE	0.048848	-4.35556	Down	0.828381	-0.271633	Down
Roots	208.062	negative	C00544	M+ACN-H[-]	0.000823123	1	0	Non-DE	0.356	-1.49005	Down	1	0	Non-DE	0.356	-1.49005	Down
Roots	209.03	negative	C00818	M-H[-]	4.19708e-05	1	0	Non-DE	1	0	Non-DE	0.45115	-1.14832	Down	0.45115	-1.14832	Down
Roots	211.133	positive	C08491	M+H[1+]	0.000274209	1	0	Non-DE	1	0	Non-DE	0.042136	-4.5688	Down	0.042136	-4.5688	Down
Roots	215.139	positive	C01909	M+H[1+]	0.000480919	1	0	Non-DE	1	0	Non-DE	0.08273	-3.59545	Down	0.08273	-3.59545	Down
Roots	217.068	positive	C06007	M+HCOONa[1+]	0.000267639	0.36461	-1.45557	Down	6.962	2.7995	Up	0.18096	-2.46626	Down	3.45532	1.78882	Up
Roots	218.103	negative	C00864	M-H[-]	0.000142392	0.15429	-2.69628	Down	0.261	-1.93788	Down	0.10383	-3.2677	Down	0.175641	-2.5093	Down
Roots	219.098	positive	C05770	M+3H[3+]	0.000614996	0.074333	-3.74985	Down	3.224	1.68885	Up	0.19516	-2.35727	Down	8.46456	3.08143	Up
Roots	219.984	positive	C05335	M+Na[1+]	0.000352796	0.15293	-2.70906	Down	1.509	0.593593	Up	0.11242	-3.15303	Down	1.10928	0.14962	Up
Roots	220.981	positive	C05946	M+NaCl[1+]	0.000842691	0.14982	-2.7387	Down	1.523	0.606916	Up	0.097678	-3.35582	Down	0.992949	-0.0102087	Down
Roots	221.03	negative	C03289	M+HCOO[-]	0.000176	0.020297	-5.62259	Down	0.194	-2.36587	Down	0.057475	-4.12092	Down	0.54935	-0.864203	Down
Roots	223.046	negative	C17214	M(Cl37)-H[-]	0.000329933	1	0	Non-DE	0.545	-0.875672	Down	0.42957	-1.21903	Down	0.234116	-2.09471	Down
Roots	229.048	negative	C05610	M+Na-2H[-]	0.000263966	1	0	Non-DE	2.308	1.20664	Up	0.42955	-1.2191	Down	0.991401	-0.0124588	Down
Roots	234.061	positive	C12138	M(C13)+2H[2+]	1.31652e-05	0.038615	-4.69469	Down	1	0	Non-DE	0.15842	-2.65817	Down	4.10255	2.03652	Up
Roots	237.061	negative	C01115	M+CH3COO[-]	0.0002851	0.080151	-3.64114	Down	0.259	-1.94898	Down	0.11158	-3.16385	Down	0.36056	-1.47169	Down
Roots	238.092	positive	C03479	M(C13)+2H[2+]	1.93707e-05	0.059347	-4.07468	Down	1	0	Non-DE	0.017138	-5.86666	Down	0.288776	-1.79198	Down
Roots	239.077	negative	C00095	M+CH3COO[-]	0.000232	1	0	Non-DE	0.365	-1.45403	Down	0.42995	-1.21776	Down	0.156932	-2.67179	Down
Roots	242	positive	C17239	M+NaCl[1+]	0.00107667	0.52059	-0.94178	Down	1	0	Non-DE	0.40424	-1.30672	Down	0.776504	-0.364936	Down
Roots	243.062	negative	C00299	M-H[-]	4.09408e-05	1	0	Non-DE	0.24	-2.05889	Down	0.51109	-0.968351	Down	0.122662	-3.02724	Down
Roots	246.977	positive	C20440	M-HCOOH+H[1+]	0.000204133	1	0	Non-DE	1	0	Non-DE	3.9312	1.97497	Up	3.9312	1.97497	Up
Roots	249.071	positive	C05933	M+NaCl[1+]	0.000987701	0.17954	-2.47762	Down	1	0	Non-DE	0.10937	-3.19271	Down	0.609168	-0.715088	Down
Roots	250.072	negative	C05619	M+ACN-H[-]	8.96323e-06	1	0	Non-DE	1	0	Non-DE	0.23606	-2.08277	Down	0.23606	-2.08277	Down
Roots	255.097	positive	C04874	M[1+]	0.000374471	0.22076	-2.17945	Down	0.132	-2.92139	Down	1	0	Non-DE	0.597934	-0.741941	Down
Roots	255.107	positive	C05401	M+H[1+]	0.000220519	0.27658	-1.85423	Down	1	0	Non-DE	0.23108	-2.11354	Down	0.835491	-0.259304	Down
Roots	256.042	positive	C20258	M+HCOONa[1+]	0.000300467	0.013904	-6.16836	Down	1	0	Non-DE	0.15945	-2.64882	Down	11.4679	3.51953	Up
Roots	259.022	negative	C02985	M-H+O[-]	0.000143337	1	0	Non-DE	0.287	-1.80088	Down	1	0	Non-DE	0.287	-1.80088	Down
Roots	261.037	positive	C04691	M-CO+H[1+]	0.000313867	0.084584	-3.56347	Down	1	0	Non-DE	1	0	Non-DE	11.8226	3.56347	Up
Roots	262.03	positive	C00333	M+HCOONa[1+]	0.000350233	0.36284	-1.46259	Down	1.35	0.432959	Up	0.25082	-1.99528	Down	0.933213	-0.0997217	Down
Roots	262.103	positive	C00475	M+H2O+H[1+]	0.000234567	0.21482	-2.2188	Down	1	0	Non-DE	0.078014	-3.68012	Down	0.36316	-1.46132	Down
Roots	262.128	positive	C08334	M+H[1+]	0.000394912	0.15143	-2.72328	Down	1	0	Non-DE	0.065202	-3.93894	Down	0.430575	-1.21566	Down
Roots	265.092	positive	C00130	M-HCOOK+H[1+]	0.00109999	1	0	Non-DE	1	0	Non-DE	0.13499	-2.88908	Down	0.13499	-2.88908	Down
Roots	267.072	negative	C00760	M-2H[2-]	4.83432e-05	0.2666	-1.90725	Down	0.249	-2.00578	Down	0.27745	-1.8497	Down	0.259134	-1.94823	Down
Roots	272.113	positive	C04083	M+HCOONa[1+]	0.000792133	1	0	Non-DE	1	0	Non-DE	0.17035	-2.55343	Down	0.17035	-2.55343	Down
Roots	274.068	positive	C00357	M-CO+H[1+]	0.000492194	1	0	Non-DE	1	0	Non-DE	0.080566	-3.63369	Down	0.080566	-3.63369	Down
Roots	278.087	positive	C03150	M+Na[1+]	0.000575867	0.53279	-0.908361	Down	1	0	Non-DE	0.38082	-1.39282	Down	0.714766	-0.484458	Down
Roots	282.084	negative	C00212	M-H+O[-]	0.000137462	1	0	Non-DE	0.251	-1.99424	Down	1	0	Non-DE	0.251	-1.99424	Down
Roots	284.099	positive	C17244	M-CO2+H[1+]	9.92332e-05	0.43309	-1.20726	Down	1	0	Non-DE	0.24375	-2.03653	Down	0.562816	-0.829265	Down
Roots	285.077	positive	C16405	M-H2O+H[1+]	0.00110763	4.7224	2.23952	Up	1	0	Non-DE	4.8569	2.28004	Up	1.02848	0.0405155	Up
Roots	286.079	positive	C04640	M-CO+H[1+]	0.000500582	2.4445	1.28954	Up	1	0	Non-DE	1	0	Non-DE	0.409082	-1.28954	Down
Roots	287.055	positive	C05909	M-H4O2+H[1+]	0.000167667	0.13347	-2.90541	Down	1	0	Non-DE	0.18384	-2.44348	Down	1.37739	0.461935	Up
Roots	288.058	positive	C05903	M(C13)+H[1+]	0.000346019	25.157	4.65289	Up	1	0	Non-DE	18.761	4.22966	Up	0.745757	-0.423223	Down
Roots	288.989	negative	C01143	M-H2O-H[-]	0.000587675	2.6224	1.39089	Up	0.225	-2.152	Down	1	0	Non-DE	0.0857993	-3.54289	Down
Roots	289.07	positive	C06196	M-CO2+H[1+]	0.000319131	0.31214	-1.67973	Down	1	0	Non-DE	0.2702	-1.8879	Down	0.865637	-0.208166	Down
Roots	289.177	positive	C03461	M+HCOONa[1+]	0.00029046	6.1614	2.62326	Up	1	0	Non-DE	4.8999	2.29275	Up	0.795258	-0.330506	Down
Roots	289.215	positive	C06093	M-CO+H[1+]	0.00107073	7.0146	2.81036	Up	1	0	Non-DE	6.3621	2.6695	Up	0.90698	-0.140858	Down
Roots	291.232	positive	C11875	M-CO+H[1+]	0.000200567	10.844	3.43883	Up	1	0	Non-DE	11.556	3.53057	Up	1.06566	0.0917451	Up
Roots	293.063	positive	C00482	M+HCOONa[1+]	6.87392e-05	0.16224	-2.6238	Down	1	0	Non-DE	0.25807	-1.95417	Down	1.59067	0.669633	Up
Roots	293.247	positive	C04742	M-CO+H[1+]	1.51568e-05	2.3076	1.20639	Up	1	0	Non-DE	2.219	1.14991	Up	0.961605	-0.0564835	Down
Roots	294.214	positive	C01226	M(C13)+H[1+]	0.000813167	1.6569	0.728487	Up	1	0	Non-DE	1	0	Non-DE	0.603537	-0.728487	Down
Roots	295.226	positive	C04717	M-H2O+H[1+]	0.000984879	4.0302	2.01085	Up	1	0	Non-DE	3.221	1.68751	Up	0.799216	-0.323343	Down
Roots	299.077	negative	C05817	M+CH3COO[-]	0.0006615	0.10709	-3.2231	Down	0.13	-2.94342	Down	1	0	Non-DE	1.21393	0.279688	Up
Roots	301.214	positive	C06427	M+Na[1+]	0.000192771	14.927	3.89985	Up	1	0	Non-DE	10.353	3.37198	Up	0.693575	-0.527875	Down
Roots	302.048	positive	C05640	M(C13)+H[1+]	0.00129246	20.383	4.34929	Up	1	0	Non-DE	10.351	3.3717	Up	0.507825	-0.977596	Down
Roots	303.154	negative	C20121	M(Cl37)-H[-]	0.000692033	1	0	Non-DE	0.314	-1.67116	Down	1	0	Non-DE	0.314	-1.67116	Down
Roots	303.229	positive	C01595	M+Na[1+]	0.000232335	3.9449	1.97999	Up	1	0	Non-DE	2.2416	1.16453	Up	0.568227	-0.81546	Down
Roots	305.07	negative	C00127	M-2H[2-]	0.00114432	0.071465	-3.80662	Down	0.266	-1.9105	Down	1	0	Non-DE	3.7221	1.89612	Up
Roots	307.226	positive	C11876	M-CO+H[1+]	0.000686315	2.0762	1.05395	Up	1	0	Non-DE	1.9326	0.950543	Up	0.930835	-0.103402	Down
Roots	309.279	positive	C20681	M+H2O+H[1+]	0.000147267	0.21249	-2.23453	Down	1	0	Non-DE	0.36993	-1.43468	Down	1.74093	0.799857	Up
Roots	311.098	negative	C05512	M+CH3COO[-]	0.000801482	0.11626	-3.10457	Down	1	0	Non-DE	1	0	Non-DE	8.60141	3.10457	Up
Roots	313.274	positive	G13038	M+3H[3+]	8.54334e-05	1.5329	0.616264	Up	1	0	Non-DE	1.5282	0.611833	Up	0.996934	-0.00443022	Down
Roots	321.315	positive	C19623	M-H4O2+H[1+]	0.000236567	0.22628	-2.14382	Down	1	0	Non-DE	0.22306	-2.1645	Down	0.98577	-0.0206772	Down
Roots	322.099	positive	C02947	M(C13)+H[1+]	0.00154247	0.39792	-1.32945	Down	1	0	Non-DE	0.47146	-1.08479	Down	1.18481	0.244657	Up
Roots	326.097	negative	C05839	M(C13)-H[-]	0.000224015	0.057406	-4.12265	Down	0.439	-1.18771	Down	0.056429	-4.14742	Down	0.431529	-1.21247	Down
Roots	327.109	negative	C05855	M-H+O[-]	0.000305067	1	0	Non-DE	1	0	Non-DE	0.20371	-2.29541	Down	0.20371	-2.29541	Down
Roots	327.304	positive	G00092	M(Cl37)+H[1+]	0.000339967	3.4094	1.76952	Up	1	0	Non-DE	5.0854	2.34636	Up	1.49158	0.576843	Up
Roots	333.09	positive	C16517	M-H4O2+H[1+]	7.69332e-05	0.49461	-1.01564	Down	1	0	Non-DE	0.49611	-1.01127	Down	1.00303	0.00436863	Up
Roots	333.153	positive	C00933	M+Na[1+]	0.00162575	4.5507	2.18609	Up	1	0	Non-DE	7.0149	2.81042	Up	1.5415	0.624334	Up
Roots	333.203	positive	C04785	M+Na[1+]	0.000359867	5.3413	2.41719	Up	1	0	Non-DE	4.06	2.02148	Up	0.760115	-0.395711	Down
Roots	337.044	negative	C00364	M-H+O[-]	0.000152911	0.21391	-2.22492	Down	1	0	Non-DE	0.14348	-2.80108	Down	0.670749	-0.576154	Down
Roots	342.112	negative	C00089	M(C13)-H[-]	0.000142321	1	0	Non-DE	0.321	-1.63935	Down	1	0	Non-DE	0.321	-1.63935	Down
Roots	342.308	positive	G00146	M+H[1+]	0.00114143	2.5766	1.36547	Up	1	0	Non-DE	3.4406	1.78266	Up	1.33533	0.417192	Up
Roots	345.133	positive	C11870	M-H2O+H[1+]	0.000165433	3.7289	1.89875	Up	1	0	Non-DE	2.6852	1.42503	Up	0.720105	-0.473721	Down
Roots	345.137	positive	C00761	M(Cl37)+H[1+]	0.00103385	0.098324	-3.34631	Down	1	0	Non-DE	0.1828	-2.45166	Down	1.85916	0.894651	Up
Roots	346.149	positive	C16443	M-H4O2+H[1+]	0.00153636	0.14286	-2.80733	Down	1	0	Non-DE	0.12911	-2.95333	Down	0.903752	-0.146001	Down
Roots	351.252	positive	C00712	M+HCOONa[1+]	0.001731	4.9037	2.29387	Up	1	0	Non-DE	3.4031	1.76685	Up	0.693986	-0.527021	Down
Roots	352.116	positive	C03451	M-CO+H[1+]	0.00144342	0.90074	-0.150817	Down	0.946	-0.0800879	Down	0.93199	-0.101614	Down	0.97882	-0.0308842	Down
Roots	357.104	negative	C05402	M-H+O[-]	1.99332e-05	0.085251	-3.55214	Down	0.246	-2.02327	Down	1	0	Non-DE	2.8856	1.52887	Up
Roots	361.327	positive	C15780	M-H4O2+H[1+]	0.0012847	0.15288	-2.70953	Down	1	0	Non-DE	0.18406	-2.44175	Down	1.20395	0.267776	Up
Roots	363.151	positive	C05399	M+H2O+H[1+]	0.00174382	1	0	Non-DE	1	0	Non-DE	0.062961	-3.9894	Down	0.062961	-3.9894	Down
Roots	365.174	positive	C20456	M(S34)+H[1+]	0.00173437	9.0207	3.17324	Up	1	0	Non-DE	7.4689	2.9009	Up	0.827973	-0.272344	Down
Roots	367.247	positive	C19418	M+HCOONa[1+]	0.00175308	5.8029	2.53677	Up	1	0	Non-DE	5.1106	2.35349	Up	0.880698	-0.183281	Down
Roots	369.239	positive	C01530	M+HCOOK[1+]	0.000827063	2.9938	1.58198	Up	1	0	Non-DE	1.7735	0.826599	Up	0.592391	-0.755379	Down
Roots	369.352	positive	C01189	M-H2O+H[1+]	2.37392e-05	1	0	Non-DE	1	0	Non-DE	4.135	2.04789	Up	4.135	2.04789	Up
Roots	370.074	positive	C02273	M[1+]	0.000498962	0.079368	-3.6553	Down	1	0	Non-DE	1	0	Non-DE	12.5995	3.6553	Up
Roots	371.147	positive	C00859	M+Na[1+]	0.000122133	3.4203	1.77412	Up	1	0	Non-DE	1	0	Non-DE	0.292372	-1.77412	Down
Roots	375.25	positive	C03242	M+HCOONa[1+]	0.000142899	5.2859	2.40215	Up	1	0	Non-DE	1	0	Non-DE	0.189183	-2.40215	Down
Roots	377.284	positive	C20692	M+H[1+]	5.81332e-05	2.0656	1.04656	Up	1	0	Non-DE	2.0786	1.05561	Up	1.00629	0.00905125	Up
Roots	380.129	negative	C00019	M-H2O-H[-]	0.0015094	1	0	Non-DE	0.321	-1.63935	Down	1	0	Non-DE	0.321	-1.63935	Down
Roots	380.284	positive	C14156	M-NH3+H[1+]	0.000849333	3.179	1.66857	Up	1	0	Non-DE	4.0968	2.0345	Up	1.28871	0.365924	Up
Roots	381.131	negative	C10646	M+Na-2H[-]	0.000703966	1	0	Non-DE	0.302	-1.72738	Down	1	0	Non-DE	0.302	-1.72738	Down
Roots	383.242	positive	C19620	M+HCOONa[1+]	0.00170553	16.862	4.0757	Up	1	0	Non-DE	11.609	3.53717	Up	0.688471	-0.538532	Down
Roots	383.367	positive	C11508	M-CO+H[1+]	5.35608e-05	3.209	1.68212	Up	1	0	Non-DE	2.9907	1.58048	Up	0.931973	-0.101641	Down
Roots	384.142	positive	C00448	M(C13)+H[1+]	0.000778695	0.60846	-0.716766	Down	1	0	Non-DE	0.58	-0.785875	Down	0.953226	-0.0691095	Down
Roots	392.12	negative	C01137	M+Cl37[-]	0.00147312	1	0	Non-DE	1	0	Non-DE	0.10781	-3.21344	Down	0.10781	-3.21344	Down
Roots	393.314	positive	C14155	M-H2O+H[1+]	0.00145865	1	0	Non-DE	1	0	Non-DE	2.1483	1.1032	Up	2.1483	1.1032	Up
Roots	397.271	positive	C06425	M+HCOOK[1+]	0.000444991	2.7298	1.4488	Up	1	0	Non-DE	1	0	Non-DE	0.366327	-1.4488	Down
Roots	397.383	positive	C22121	M-CO+H[1+]	0.000141567	1	0	Non-DE	1	0	Non-DE	1.9527	0.96547	Up	1.9527	0.96547	Up
Roots	397.383	positive	C01943	M-HCOOH+H[1+]	6.37892e-05	3.6383	1.86326	Up	1	0	Non-DE	3.6537	1.86936	Up	1.00423	0.00609367	Up
Roots	399.304	positive	C00828	M-HCOOH+H[1+]	0.000916295	1	0	Non-DE	1	0	Non-DE	2.0697	1.04942	Up	2.0697	1.04942	Up
Roots	400.365	positive	C15777	M(C13)+H[1+]	0.000185561	3.6342	1.86164	Up	1	0	Non-DE	3.1213	1.64215	Up	0.858869	-0.219491	Down
Roots	402.088	positive	C04352	M[1+]	0.00147995	0.18325	-2.44811	Down	1	0	Non-DE	0.30726	-1.70247	Down	1.67673	0.745647	Up
Roots	404.12	negative	C21650	M+Na-2H[-]	0.00132193	0.13451	-2.89421	Down	0.308	-1.699	Down	1	0	Non-DE	2.28979	1.19522	Up
Roots	409.329	positive	C08281	M+HCOONa[1+]	0.000335081	4.0993	2.03538	Up	1	0	Non-DE	2.32	1.21412	Up	0.56595	-0.821253	Down
Roots	409.347	positive	C13309	M-CO+H[1+]	0.000287981	4.4458	2.15244	Up	1	0	Non-DE	2.6766	1.4204	Up	0.602051	-0.732041	Down
Roots	409.382	positive	C19863	M-H4O2+H[1+]	0.000386667	2.2263	1.15465	Up	1	0	Non-DE	2.2267	1.15491	Up	1.00018	0.000259186	Up
Roots	415.386	positive	G00093	M-C3H4O2+H[1+]	0.000225533	2.8389	1.50533	Up	1	0	Non-DE	3.2504	1.70062	Up	1.14495	0.195285	Up
Roots	415.394	positive	C01753	M+H[1+]	0.000559803	5.8282	2.54305	Up	1	0	Non-DE	7.9246	2.98634	Up	1.3597	0.443288	Up
Roots	421.218	positive	C00427	M+HCOONa[1+]	0.0014052	7.5478	2.91606	Up	1	0	Non-DE	9.1463	3.19319	Up	1.21178	0.277132	Up
Roots	425.248	positive	C05951	M-C3H4O2+H[1+]	0.000879943	6.4804	2.69608	Up	1	0	Non-DE	5.2973	2.40526	Up	0.817434	-0.290826	Down
Roots	425.342	positive	C14153	M+H[1+]	0.000382781	3.268	1.70841	Up	1	0	Non-DE	1.6719	0.741489	Up	0.511597	-0.966919	Down
Roots	425.378	positive	C03313	M-CO+H[1+]	2.02532e-05	1.5263	0.610039	Up	1	0	Non-DE	1.4815	0.567059	Up	0.970648	-0.0429799	Down
Roots	429.373	positive	C22123	M+H2O+H[1+]	1.05332e-05	2.997	1.58352	Up	1	0	Non-DE	1.7889	0.839073	Up	0.596897	-0.744446	Down
Roots	430.319	positive	C15792	M-NH3+H[1+]	0.00138237	3.894	1.96125	Up	1	0	Non-DE	5.1436	2.36278	Up	1.3209	0.401526	Up
Roots	431.353	positive	C16253	M+H[1+]	0.000719833	1	0	Non-DE	1	0	Non-DE	9.0973	3.18544	Up	9.0973	3.18544	Up
Roots	431.388	positive	C02477	M+H[1+]	6.75108e-05	1	0	Non-DE	1	0	Non-DE	22.091	4.46539	Up	22.091	4.46539	Up
Roots	432.107	negative	C12137	M-H[-]	0.00169607	1	0	Non-DE	0.332	-1.59074	Down	0.25478	-1.97268	Down	0.084587	-3.56342	Down
Roots	435.36	positive	C15782	M+Na[1+]	0.000142267	1	0	Non-DE	1	0	Non-DE	1.4183	0.504163	Up	1.4183	0.504163	Up
Roots	437.375	positive	C15915	M+Na[1+]	6.84888e-05	2.0691	1.049	Up	1	0	Non-DE	2.0767	1.05429	Up	1.00367	0.00528945	Up
Roots	439.076	negative	C20454	M+Br[-]	0.0008518	1	0	Non-DE	0.248	-2.01159	Down	1	0	Non-DE	0.248	-2.01159	Down
Roots	440.36	positive	C21084	M(C13)+H[1+]	4.73668e-05	4.0264	2.00949	Up	1	0	Non-DE	6.6499	2.73333	Up	1.65157	0.723842	Up
Roots	441.408	positive	C08830	M+H[1+]	0.00135497	5.6702	2.5034	Up	1	0	Non-DE	9.4269	3.23678	Up	1.66253	0.733384	Up
Roots	443.305	positive	C05437	M+NaCl[1+]	0.000102803	44.021	5.46012	Up	1	0	Non-DE	30.003	4.90703	Up	0.681561	-0.553085	Down
Roots	445.348	positive	C22119	M(S34)+H[1+]	7.30668e-05	6.4705	2.69388	Up	1	0	Non-DE	3.5305	1.81987	Up	0.54563	-0.874005	Down
Roots	449.375	positive	C01054	M+Na[1+]	0.000218589	2.2406	1.16389	Up	1	0	Non-DE	3.8086	1.92926	Up	1.69981	0.765376	Up
Roots	451.358	positive	C15791	M(S34)+H[1+]	0.000222167	3.0735	1.61988	Up	1	0	Non-DE	2.0833	1.05887	Up	0.677827	-0.561012	Down
Roots	457.367	positive	C22120	M+H[1+]	0.000136367	3.9619	1.98619	Up	1	0	Non-DE	1	0	Non-DE	0.252404	-1.98619	Down
Roots	463.075	positive	C03794	M[1+]	0.000485745	3.5708	1.83625	Up	1	0	Non-DE	3.9612	1.98594	Up	1.10933	0.14969	Up
Roots	465.35	positive	C11523	M+K[1+]	0.00110893	2.1439	1.10024	Up	1	0	Non-DE	2.2072	1.14222	Up	1.02953	0.0419797	Up
Roots	471.09	positive	C01175	M+HCOOK[1+]	1.88332e-05	7.6916	2.94328	Up	1	0	Non-DE	6.1675	2.62469	Up	0.801849	-0.318598	Down
Roots	471.347	positive	C15793	M+Na[1+]	0.00230231	1	0	Non-DE	1	0	Non-DE	6.6936	2.74278	Up	6.6936	2.74278	Up
Roots	473.339	positive	C15801	M+K[1+]	2.91332e-05	9.9078	3.30856	Up	1	0	Non-DE	13.147	3.71666	Up	1.32693	0.408097	Up
Roots	474.174	positive	C00445	M+H2O+H[1+]	0.000576094	0.15779	-2.66392	Down	1	0	Non-DE	0.14072	-2.8291	Down	0.891818	-0.165178	Down
Roots	479.386	positive	C00751	M+HCOONa[1+]	0.000134633	5.1322	2.35958	Up	1	0	Non-DE	7.5886	2.92383	Up	1.47863	0.564256	Up
Roots	483.344	positive	C15796	M+HCOONa[1+]	0.000351667	5.5219	2.46516	Up	1	0	Non-DE	12.179	3.60632	Up	2.20558	1.14116	Up
Roots	485.359	positive	C15883	M+HCOONa[1+]	0.00153097	4.0037	2.00133	Up	1	0	Non-DE	4.5229	2.17725	Up	1.12968	0.175914	Up
Roots	487.064	positive	C01750	M+K[1+]	0.000689351	10.605	3.40667	Up	1	0	Non-DE	1	0	Non-DE	0.0942951	-3.40667	Down
Roots	489.312	positive	C02059	M+K[1+]	0.000170283	3.5352	1.82179	Up	1	0	Non-DE	4.9494	2.30725	Up	1.40003	0.485462	Up
Roots	489.394	positive	C22116	M+H2O+H[1+]	0.000171567	6.6403	2.73125	Up	1	0	Non-DE	5.2911	2.40357	Up	0.796816	-0.327681	Down
Roots	496.34	positive	C19874	M[1+]	0.000267	1	0	Non-DE	1	0	Non-DE	1.5338	0.61711	Up	1.5338	0.61711	Up
Roots	500.919	negative	C11555	M(Cl37)-H[-]	0.000733011	1	0	Non-DE	0.4	-1.32193	Down	0.37164	-1.42802	Down	0.148656	-2.74995	Down
Roots	512.148	positive	C00415	M+HCOONa[1+]	0.00205521	0.36902	-1.43823	Down	0.386	-1.37333	Down	1	0	Non-DE	1.04601	0.0649018	Up
Roots	517.33	positive	C15800	M+HCOOK[1+]	0.000889333	65.867	6.04148	Up	1	0	Non-DE	71.625	6.16239	Up	1.08742	0.120907	Up
Roots	525.375	positive	C08580	M-C3H4O2+H[1+]	0.00206258	5.734	2.51954	Up	1	0	Non-DE	3.3939	1.76294	Up	0.59189	-0.756598	Down
Roots	533.414	positive	C08592	M-H2O+H[1+]	9.68332e-05	7.2471	2.8574	Up	1	0	Non-DE	1	0	Non-DE	0.137986	-2.8574	Down
Roots	535.36	positive	C15803	M+HCOONa[1+]	0.000179967	4.9485	2.30699	Up	1	0	Non-DE	1	0	Non-DE	0.202081	-2.30699	Down
Roots	536.439	positive	C05433	M[1+]	0.000485197	1	0	Non-DE	1	0	Non-DE	0.26048	-1.94076	Down	0.26048	-1.94076	Down
Roots	538.446	positive	C05432	M(C13)+H[1+]	0.00265187	1	0	Non-DE	1	0	Non-DE	0.22605	-2.14529	Down	0.22605	-2.14529	Down
Roots	541.319	positive	C03428	M-HCOOH+H[1+]	0.00144961	27.033	4.75665	Up	1	0	Non-DE	14.041	3.81157	Up	0.519402	-0.945076	Down
Roots	549.167	negative	C05404	M+HCOO[-]	0.000208124	0.049485	-4.33686	Down	0.322	-1.63487	Down	0.051849	-4.26954	Down	0.337383	-1.56754	Down
Roots	558.088	positive	C05674	M+HCOOK[1+]	0.000362095	0.17917	-2.4806	Down	1	0	Non-DE	0.030416	-5.03903	Down	0.169761	-2.55843	Down
Roots	561.503	positive	C05414	M+H2O+H[1+]	0.000267151	2.7392	1.45375	Up	1	0	Non-DE	3.3901	1.76133	Up	1.23762	0.307573	Up
Roots	567.42	positive	C15965	M+H[1+]	4.03323e-06	6.7025	2.7447	Up	1	0	Non-DE	5.3918	2.43077	Up	0.804446	-0.313932	Down
Roots	570.438	positive	C06098	M(C13)+H[1+]	0.000857903	2.2259	1.15439	Up	1	0	Non-DE	1.979	0.984772	Up	0.889079	-0.169617	Down
Roots	583.415	positive	C08583	M+H2O+H[1+]	0.000283219	7.5862	2.92338	Up	1	0	Non-DE	5.9727	2.57838	Up	0.787311	-0.344994	Down
Roots	583.464	positive	C05421	M+K[1+]	0.000348233	0.67181	-0.573875	Down	1	0	Non-DE	1	0	Non-DE	1.48852	0.573875	Up
Roots	584.423	positive	C08579	M[1+]	4.58e-05	11.238	3.49031	Up	1	0	Non-DE	5.3885	2.42988	Up	0.479489	-1.06043	Down
Roots	586.276	positive	C05913	M(C13)+H[1+]	0.00165973	7.6033	2.92663	Up	1	0	Non-DE	18.494	4.20899	Up	2.43236	1.28236	Up
Roots	594.281	positive	C18021	M(C13)+H[1+]	0.00142463	0.51808	-0.948753	Down	1	0	Non-DE	0.54755	-0.868937	Down	1.05688	0.0798158	Up
Roots	595.166	positive	C21854	M+H[1+]	0.000135967	4.8208	2.26927	Up	1	0	Non-DE	12.139	3.60158	Up	2.51805	1.33231	Up
Roots	595.166	negative	C09826	M-H[-]	0.000717087	0.29249	-1.77354	Down	1	0	Non-DE	0.19103	-2.38813	Down	0.653116	-0.614588	Down
Roots	595.166	positive	C08725	M[1+]	0.000196878	0.026065	-5.26174	Down	1	0	Non-DE	0.090416	-3.46728	Down	3.46887	1.79446	Up
Roots	599.41	positive	C15967	M+H2O+H[1+]	0.000526133	3.5699	1.83588	Up	1	0	Non-DE	6.9192	2.79061	Up	1.93821	0.954722	Up
Roots	600.418	positive	C08614	M[1+]	3.62e-06	2.8932	1.53267	Up	1	0	Non-DE	6.5246	2.70589	Up	2.25515	1.17322	Up
Roots	601.264	positive	C00500	M+H2O+H[1+]	0.0020368	2.5115	1.32855	Up	1	0	Non-DE	1.9516	0.964657	Up	0.777065	-0.363892	Down
Roots	601.425	positive	C15968	M+H2O+H[1+]	8.93332e-05	4.4864	2.16556	Up	1	0	Non-DE	4.282	2.09828	Up	0.95444	-0.0672735	Down
Roots	615.245	positive	C18155	M-H2O+H[1+]	0.000367867	8.3447	3.06086	Up	1	0	Non-DE	10.284	3.36233	Up	1.2324	0.301469	Up
Roots	616.248	positive	C02139	M(C13)+H[1+]	0.000677267	25.489	4.6718	Up	1	0	Non-DE	13.127	3.71447	Up	0.515006	-0.957338	Down
Roots	617.511	positive	G00108	M(C13)+H[1+]	0.000714433	1	0	Non-DE	1	0	Non-DE	2.3771	1.2492	Up	2.3771	1.2492	Up
Roots	623.406	positive	C13431	M+Na[1+]	0.00116137	2.1702	1.11783	Up	1	0	Non-DE	3.1177	1.64048	Up	1.4366	0.522654	Up
Roots	629.26	positive	C00461	M(C13)+H[1+]	0.000422554	3.8933	1.96099	Up	1	0	Non-DE	3.1849	1.67125	Up	0.818046	-0.289745	Down
Roots	632.263	positive	C18070	M+H[1+]	0.00277673	8.4818	3.08437	Up	1	0	Non-DE	6.2037	2.63313	Up	0.731413	-0.451242	Down
Roots	639.488	positive	C03427	M-HCOOK+H[1+]	0.00208892	7.219	2.8518	Up	1	0	Non-DE	11.61	3.5373	Up	1.60826	0.685497	Up
Roots	641.175	negative	C02191	M+Br[-]	0.0012433	0.52669	-0.924974	Down	0.234	-2.09542	Down	1	0	Non-DE	0.444284	-1.17045	Down
Roots	643.19	positive	C03516	M+NaCl[1+]	0.00315917	0.40035	-1.32067	Down	1	0	Non-DE	0.45668	-1.13074	Down	1.1407	0.189922	Up
Roots	685.241	positive	C18022	M+NaCl[1+]	0.000893533	0.2957	-1.75779	Down	1	0	Non-DE	1	0	Non-DE	3.38181	1.75779	Up
Roots	706.613	positive	G13039	M-CO+H[1+]	0.000643533	1	0	Non-DE	1	0	Non-DE	1.7746	0.827494	Up	1.7746	0.827494	Up
Roots	752.642	positive	C16695	M(C13)+H[1+]	0.000208633	0.32887	-1.60441	Down	1	0	Non-DE	0.3822	-1.3876	Down	1.16216	0.21681	Up
Roots	767.071	positive	C00006	M+Na[1+]	0.00110304	0.12853	-2.95982	Down	1	0	Non-DE	1	0	Non-DE	7.78028	2.95982	Up
Roots	785.663	positive	G13073	M+K[1+]	0.000354033	0.3326	-1.58814	Down	1	0	Non-DE	0.40242	-1.31323	Down	1.20992	0.274914	Up
Roots	793.511	positive	C04145	M(Cl37)+H[1+]	0.000555367	10.12	3.33914	Up	1	0	Non-DE	14.646	3.87243	Up	1.44723	0.533297	Up
Roots	796.593	positive	G00149	M+HCOONa[1+]	0.00168597	1	0	Non-DE	1	0	Non-DE	11.36	3.50589	Up	11.36	3.50589	Up
Roots	798.232	positive	C05268	M-HCOOK+H[1+]	0.0027665	0.035566	-4.81336	Down	1	0	Non-DE	1	0	Non-DE	28.1167	4.81336	Up
Roots	805.611	positive	C17570	M+HCOONa[1+]	0.000987633	0.3734	-1.42121	Down	1	0	Non-DE	1	0	Non-DE	2.67809	1.42121	Up
Roots	857.659	positive	G00109	M+K[1+]	0.00414247	0.36141	-1.46829	Down	1	0	Non-DE	0.42215	-1.24417	Down	1.16806	0.224119	Up
Roots	858.755	positive	C20690	M+K[1+]	0.00201297	2.7262	1.44689	Up	1	0	Non-DE	3.9114	1.96769	Up	1.43474	0.520794	Up
Roots	872.168	positive	C06000	M+H2O+H[1+]	0.00236097	0.12099	-3.04704	Down	1	0	Non-DE	0.14636	-2.77241	Down	1.20969	0.274634	Up
Roots	874.786	positive	G00428	M+Na[1+]	0.00376797	1.9801	0.985573	Up	1	0	Non-DE	2.9724	1.57163	Up	1.50114	0.586055	Up
Roots	894.701	positive	G13037	M[1+]	0.0008298	1.5566	0.638398	Up	1	0	Non-DE	1.6896	0.756682	Up	1.08544	0.118283	Up
Roots	907.522	positive	C05307	M+H[1+]	9.03432e-05	0.58964	-0.762094	Down	1	0	Non-DE	0.68491	-0.546014	Down	1.16157	0.21608	Up
Roots	909.529	positive	C05797	M+K[1+]	7.01668e-05	2.4816	1.31127	Up	1	0	Non-DE	3.6436	1.86536	Up	1.46825	0.554094	Up
Roots	911.533	positive	C18151	M(S34)+H[1+]	0.000156567	0.21513	-2.21672	Down	1	0	Non-DE	1	0	Non-DE	4.64835	2.21672	Up
Roots	927.82	positive	G01977	M+H2O+H[1+]	0.00262213	1.7276	0.788769	Up	1	0	Non-DE	1.9659	0.97519	Up	1.13794	0.186421	Up
Roots	961.792	positive	G00005	M+HCOONa[1+]	0.00236867	0.048568	-4.36385	Down	1	0	Non-DE	0.13525	-2.8863	Down	2.78476	1.47755	Up
Roots	977.504	positive	C05306	M+HCOOK[1+]	0.000231897	1	0	Non-DE	1	0	Non-DE	0.23277	-2.10302	Down	0.23277	-2.10302	Down
Roots	1072.24	positive	C16335	M+HCOOK[1+]	0.00523728	1	0	Non-DE	1	0	Non-DE	0.060607	-4.04437	Down	0.060607	-4.04437	Down
Roots	1503.41	positive	G00019	M+H[1+]	0.00184047	0.14206	-2.81543	Down	1	0	Non-DE	0.24637	-2.0211	Down	1.73427	0.794326	Up
